# Supplementary material for: Integrated analysis to find MicroRNAs and Genes Associated with Metastasis and Cisplatin and 5-Fluorouracil Resistance Gastric Cancer
Source: Research Square preprint supplement (doi:10.21203/rs.3.rs-5416147/v1), 2024-12-10
Supplement: Supplementary file 1 [file 402ad7597322e081fb7a4041.xlsx]

## Sheet: All Genes
	Adj P-valu	FC	Genes
214612_x_at	0.00373	2.0276	MAGEA6
214603_at	2.44e-05	2.00733	MAGEA2B///MAGEA2
205319_at	0.000426	1.90072	PSCA
213265_at	0.00961	1.83265	PGA4///PGA3///PGA5
219398_at	9.38e-13	1.76317	CIDEC
206700_s_at	1.43e-06	1.75558	KDM5D
210467_x_at	0.00604	1.73283	MAGEA12
205000_at	5.98e-05	1.72342	DDX3Y
207912_s_at	0.00536	1.68817	DAZ4///DAZ2///DAZ3///DAZ1
210546_x_at	3.58e-05	1.65583	CTAG1A///CTAG1B
201909_at	0.002	1.60421	RPS4Y1
214254_at	0.000522	1.56382	MAGEA4
221122_at	0.000141	1.5589	HRASLS2
214642_x_at	6.43e-05	1.55863	MAGEA10-MAGEA5///MAGEA5
207909_x_at	0.0053	1.55321	DAZ4///DAZ2///DAZ3///DAZ1
215733_x_at	1.27e-05	1.54325	CTAG2
205623_at	4.73e-05	1.53825	ALDH3A1
209942_x_at	0.0296	1.52642	MAGEA6///MAGEA3
204410_at	1.1e-11	1.49265	EIF1AY
213456_at	0.000457	1.47977	SOSTDC1
208282_x_at	0.00922	1.47655	DAZ4///DAZ2///DAZ3///DAZ1
214183_s_at	2.27e-05	1.46437	TKTL1
212999_x_at	2.27e-06	1.461	LOC101060835///HLA-DQB1
204409_s_at	3.35e-05	1.44063	EIF1AY
201883_s_at	4.93e-12	1.42734	B4GALT1
210119_at	1.3e-05	1.41829	KCNJ15
209757_s_at	2.34e-07	1.40173	MYCN
211674_x_at	0.000953	1.39484	CTAG1A///CTAG1B
205979_at	0.00168	1.38936	SCGB2A1
207605_x_at	7.7e-07	1.38195	ZNF117
217235_x_at	1e-05	1.3796	IGLL5
217148_x_at	0.000215	1.37618	IGLJ3///IGLV@///IGLC1
213695_at	1.24e-05	1.37101	PON3
209374_s_at	0.00283	1.37028	IGHM
205650_s_at	2.67e-06	1.36448	FGA
203243_s_at	2.6e-08	1.35889	PDLIM5
207546_at	0.00606	1.35661	ATP4B
208281_x_at	0.00511	1.35218	DAZ4///DAZ2///DAZ3///DAZ1
210437_at	7.4e-05	1.35135	MAGEA9B///MAGEA9
207033_at	0.0273	1.34599	GIF
212807_s_at	1.89e-14	1.34196	SORT1
221491_x_at	1.17e-06	1.33823	LOC101060835///LOC100996809///HLA-DRB6///HLA-DRB5///HLA-DRB4///HLA-DRB3///HLA-DRB1///HLA-DQB1
210397_at	8.7e-05	1.33745	DEFB1
213831_at	0.00692	1.33533	LOC100509457///HLA-DQA1
205067_at	0.000223	1.33401	IL1B
209995_s_at	1.52e-17	1.32169	TCL1A
216419_at	3.04e-09	1.32145	CROCC
205259_at	2.03e-07	1.32125	NR3C2
203913_s_at	0.00402	1.31476	HPGD
216984_x_at	1.85e-05	1.30228	IGLJ3///IGLV1-44///CKAP2///IGLV@///IGLC1
214079_at	0.00148	1.29264	DHRS2
211645_x_at	0.000837	1.29131
215214_at	0.000169	1.28921	IGLC1
203535_at	0.00076	1.28526	S100A9
210735_s_at	2.22e-09	1.28477	CA12
219752_at	7.31e-12	1.28126	RASAL1
211549_s_at	0.000209	1.28035	HPGD
206334_at	0.0847	1.279	LIPF
214777_at	0.000728	1.27851	IGKC
214091_s_at	1.58e-06	1.27725	GPX3
205910_s_at	1.27e-07	1.27455	CEL
219566_at	2.48e-07	1.2711	PLEKHF1
205199_at	0.000327	1.26751	CA9
222294_s_at	8.44e-07	1.26385	RAB27A
203963_at	7.78e-05	1.26053	CA12
203632_s_at	8.36e-05	1.25359	GPRC5B
211643_x_at	0.000166	1.25089	IGK///IGKC
217362_x_at	8.18e-08	1.25002	HLA-DRB6
203874_s_at	6.13e-05	1.24994	SMARCA1
217546_at	0.00166	1.24919	MT1M
205343_at	0.00722	1.24828	SULT1C2
216853_x_at	2.69e-05	1.24657	IGLJ3
211695_x_at	1.33e-06	1.2428	MUC1
217550_at	7.13e-10	1.24024	ATF6
210157_at	7.15e-08	1.23778	URI1
205464_at	9.87e-12	1.23724	SCNN1B
217014_s_at	7.73e-07	1.23678	AZGP1P1///AZGP1
220609_at	1.59e-07	1.23146	LOC202181
214792_x_at	1.1e-17	1.23007	VAMP2
202903_at	3.31e-12	1.22858	LSM5
214916_x_at	0.000142	1.22621	IGHV3-23///IGHV4-31///IGHM///IGHG3///IGHG1///IGHA2///IGHA1
214476_at	0.00816	1.22522	TFF2
205554_s_at	1.47e-07	1.22467	DNASE1L3
216236_s_at	0.00015	1.2243	SLC2A14///SLC2A3
220266_s_at	2.07e-05	1.22393	KLF4
220357_s_at	7.57e-11	1.22085	SGK2
214973_x_at	0.000351	1.2201	IGHD
217626_at	7.66e-07	1.21821	AKR1C1
221286_s_at	2.19e-05	1.21602	MZB1
203739_at	2.84e-05	1.21551	ZNF217
219326_s_at	1.65e-09	1.21487	B3GNT2
220622_at	3.63e-06	1.21442	LRRC31
220191_at	0.0992	1.21231	GKN1
39402_at	0.000275	1.2116	IL1B
210915_x_at	4.18e-06	1.21124	TRBC1
207522_s_at	1.97e-05	1.21119	ATP2A3
219281_at	5.99e-13	1.21056	MSRA
204161_s_at	3.98e-12	1.21041	ENPP4
200696_s_at	8.18e-08	1.21041	GSN
214421_x_at	0.000418	1.20917	CYP2C9
219562_at	8.76e-11	1.20687	RAB26
219223_at	2.01e-12	1.20652	CACFD1
218546_at	3.6e-06	1.20322	C1orf115
214768_x_at	0.00294	1.20228	IGKC
214756_x_at	4.47e-19	1.19916	PMS2P1
219695_at	2.94e-09	1.19733	SMPD3
207535_s_at	1.09e-14	1.19699	NFKB2
219250_s_at	0.000125	1.19674	FLRT3
214235_at	0.00119	1.19612	CYP3A5
206561_s_at	0.0209	1.19381	AKR1B10
219321_at	1.4e-11	1.19336	MPP5
215483_at	3.77e-08	1.19181	AKAP9
219429_at	3.21e-05	1.19153	FA2H
221156_x_at	1.84e-12	1.19097	CCPG1
212496_s_at	2.74e-14	1.19021	KDM4B
207065_at	1.55e-21	1.19	KRT75
218010_x_at	2.07e-10	1.18978	PPDPF
205270_s_at	2.79e-06	1.18882	LCP2
217117_x_at	4.64e-09	1.18838	MUC3B///MUC3A
207601_at	4.3e-06	1.188	SULT1B1
216782_at	1.83e-06	1.18542
201864_at	1.21e-15	1.18522	GDI1
205160_at	9.04e-12	1.18133	PEX11A
64440_at	1.85e-20	1.18119	IL17RC
208109_s_at	1.29e-08	1.18015	LINC00597
222272_x_at	8.39e-28	1.17828	SCIN
202581_at	1.52e-06	1.17791	HSPA1B///HSPA1A
205342_s_at	0.0124	1.17786	SULT1C2
214830_at	1.43e-09	1.1769	SLC38A6
219735_s_at	1.47e-09	1.17597	TFCP2L1
209606_at	2.36e-05	1.17528	CYTIP
222233_s_at	5.3e-08	1.17499	DCLRE1C
202311_s_at	0.000553	1.17311	COL1A1
222159_at	1.11e-11	1.16863
210185_at	5.16e-17	1.16845	CACNB1
206208_at	9.88e-08	1.16796	CA4
51158_at	2.03e-13	1.16705	FAM174B
201348_at	0.000133	1.16655	GPX3
205403_at	0.00349	1.16615	IL1R2
200648_s_at	3.03e-05	1.16582	GLUL
203471_s_at	9.67e-05	1.16576	PLEK
220030_at	0.00013	1.16505	STYK1
205691_at	3.66e-07	1.16377	SYNGR3
212285_s_at	3.79e-09	1.16366	AGRN
219630_at	0.00342	1.16156	PDZK1IP1
201534_s_at	1.68e-09	1.16119	UBL3
214465_at	0.0002	1.16033	ORM2///ORM1
212657_s_at	0.000714	1.15879	IL1RN
215176_x_at	0.00172	1.15847	IGK///IGKC
221943_x_at	5.1e-06	1.1584	RPL38
217378_x_at	0.00031	1.15737	IGKV1OR2-108
207139_at	0.000513	1.15699	ATP4A
203875_at	2.21e-06	1.15626	SMARCA1
220463_at	1.04e-23	1.15596	TRPM3
212768_s_at	0.0444	1.1557	OLFM4
205040_at	0.000409	1.15407	ORM1
209370_s_at	5.61e-19	1.15379	SH3BP2
215125_s_at	0.00549	1.15328	UGT1A3///UGT1A1///UGT1A4///UGT1A9///UGT1A5///UGT1A6///UGT1A7///UGT1A8///UGT1A10
209703_x_at	2.15e-09	1.15283	METTL7A
213900_at	2.08e-08	1.14967	FAM189A2
200890_s_at	7.63e-07	1.14954	SSR1
204633_s_at	1.4e-08	1.14897	RPS6KA5
210641_at	0.00142	1.14871	CAPN9
219799_s_at	0.000101	1.14844	DHRS9
211548_s_at	0.00962	1.14658	HPGD
214750_at	1.3e-13	1.14463	PLAC4
210594_x_at	1.06e-11	1.14461	MPZL1
201556_s_at	2.37e-19	1.14249	VAMP2
215100_at	4.3e-06	1.1384	ADTRP
220445_s_at	0.00251	1.13765	CSAG2///CSAG3
219564_at	0.00048	1.1373	KCNJ16
204199_at	1.44e-08	1.13729	RALGPS1
214823_at	4.51e-13	1.13552	ZNF204P
213792_s_at	8.57e-08	1.13546	INSR
209728_at	0.0274	1.13531	HLA-DRB4
205831_at	6.07e-06	1.1352	CD2
205660_at	0.000351	1.13503	OASL
213717_at	6.9e-14	1.13409	LDB3
202708_s_at	2.24e-06	1.13397	HIST2H2BE
204669_s_at	8.01e-08	1.13165	RNF24
211653_x_at	0.000214	1.13163	LOC101930400///AKR1C2
209480_at	0.00998	1.13078	HLA-DQB1
221132_at	0.0142	1.13029	CLDN18
212450_at	2.64e-08	1.13002	SECISBP2L
205517_at	0.000164	1.1299	GATA4
204777_s_at	3.62e-06	1.12943	MAL
215754_at	2.5e-16	1.12698	SCARB2
217162_at	2.78e-14	1.12445	TSPY1
207651_at	1.24e-09	1.12392	GPR171
216351_x_at	0.0161	1.12226	DAZ4///DAZ2///DAZ3///DAZ1
216418_at	3.08e-14	1.12198
205922_at	1.18e-06	1.12033	VNN2
217236_x_at	9.93e-12	1.11966	IGHV4-31///IGHM///IGHG4///IGHG3///IGHG1///IGHD///IGHA2///IGHA1///IGH
212091_s_at	1.95e-07	1.11932	COL6A1
206094_x_at	0.00122	1.11752	UGT1A3///UGT1A1///UGT1A4///UGT1A9///UGT1A5///UGT1A6///UGT1A7///UGT1A8///UGT1A10
204959_at	0.000624	1.11683	MNDA
221750_at	1.56e-07	1.11623	HMGCS1
208596_s_at	0.00222	1.11511	UGT1A3///UGT1A1///UGT1A4///UGT1A9///UGT1A5///UGT1A6///UGT1A7///UGT1A8///UGT1A10
213298_at	9.29e-13	1.11495	NFIC
219400_at	2.89e-15	1.11334	CNTNAP1
211689_s_at	2.12e-05	1.11283	TMPRSS2
219509_at	6.03e-16	1.1127	MYOZ1
210143_at	0.0159	1.11198	ANXA10
207023_x_at	2.66e-09	1.11134	KRT10
201801_s_at	1.5e-07	1.11056	SLC29A1
211637_x_at	0.000181	1.11033	IGHV3-23///IGHV4-31///IGHM///IGHG4///IGHG3///IGHG1///IGHD///IGHA2///IGHA1///IGH
204237_at	0.000337	1.11023	GULP1
206025_s_at	0.002	1.11004	TNFAIP6
205717_x_at	4.56e-12	1.10834	PCDHGA1///PCDHGA2///PCDHGA3///PCDHGA4///PCDHGA5///PCDHGA6///PCDHGA7///PCDHGA9///PCDHGA10///PCDHGA11///PCDHGB1///PCDHGB2///PCDHGB3///PCDHGB5///PCDHGB6///PCDHGB7///PCDHGC4///PCDHGC5///PCDHGA12///PCDHGA8///PCDHGB4///PCDHGC3
219956_at	0.000221	1.10756	GALNT6
215068_s_at	5.31e-12	1.10684	FBXL18
202017_at	3.99e-07	1.1066	EPHX1
213637_at	5.51e-09	1.10659	DDX52
221045_s_at	7.03e-07	1.10618	PER3
210056_at	1.53e-09	1.10593	RND1
220748_s_at	1.29e-11	1.10564	ZNF580
211793_s_at	2.58e-12	1.10519	ABI2
203555_at	3.46e-10	1.1045	PTPN18
202917_s_at	0.00808	1.10417	S100A8
215471_s_at	1.03e-11	1.10326	MAP7
220177_s_at	0.000162	1.10313	TMPRSS3
221095_s_at	0.000356	1.10213	KCNE2
215247_at	2.17e-16	1.10188	LOC100288570
213986_s_at	1.19e-10	1.10164	TMEM259
204908_s_at	4.9e-10	1.10116	MIR8085///BCL3
220371_s_at	2.1e-13	1.10059	SLC12A9
203224_at	2.82e-09	1.09976	RFK
217506_at	2.51e-06	1.09931
218880_at	1.51e-08	1.09831	FOSL2
205166_at	7.57e-08	1.09732	CAPN5
204477_at	8.14e-23	1.09674	RABIF
221577_x_at	0.00146	1.09603	GDF15
221856_s_at	2.91e-14	1.09561	FAM63A
203343_at	6.12e-06	1.09557	UGDH
220017_x_at	0.000286	1.09529	CYP2C9
211098_x_at	4e-12	1.09419	TMCO1
216560_x_at	0.00234	1.09386	IGLC1
206263_at	1.59e-12	1.09312	FMO4
201118_at	2.49e-08	1.09266	PGD
1405_i_at	6.98e-05	1.09262	CCL5
220097_s_at	2.47e-16	1.09197	TMEM104
211241_at	1.06e-18	1.09183	ANXA2P3
204563_at	0.000191	1.0915	SELL
219014_at	0.00738	1.09118	PLAC8
203925_at	7.48e-08	1.09029	GCLM
204038_s_at	1.1e-16	1.09018	LPAR1
205992_s_at	8.31e-06	1.0895	IL15
203908_at	0.00374	1.08729	SLC4A4
205289_at	9.09e-06	1.08675	BMP2
209189_at	0.000113	1.08615	FOS
203936_s_at	9.9e-05	1.08599	MMP9
211959_at	0.000313	1.08561	IGFBP5
207847_s_at	0.000313	1.08552	MUC1
212594_at	4.73e-07	1.0853	MIR4680///PDCD4
204341_at	7.44e-07	1.08509	TRIM16
214526_x_at	4.45e-12	1.08491	PMS2P1
214726_x_at	1.13e-14	1.08398	ADD1
203657_s_at	1.45e-13	1.08248	CTSF
220352_x_at	4.37e-13	1.08213	FLJ42627
36564_at	1.69e-06	1.0817	RNF19B
205041_s_at	0.0156	1.08119	ORM2///ORM1
208473_s_at	0.00147	1.08068	GP2
212927_at	1.94e-08	1.0804	SMC5
217179_x_at	0.000813	1.07903	BMS1P20
216243_s_at	2.74e-05	1.07878	IL1RN
214370_at	2.08e-07	1.07865	S100A8
206337_at	5.57e-08	1.07829	CCR7
208024_s_at	6.52e-09	1.07749	DGCR6L///DGCR6
209367_at	2.16e-09	1.07547	STXBP2
209309_at	0.00429	1.07532	AZGP1
205959_at	5.03e-06	1.07491	MMP13
205869_at	0.000904	1.07469	PRSS2///PRSS1
205168_at	1.47e-07	1.07421	DDR2
207469_s_at	1.77e-05	1.07409	PIR
217617_at	1.91e-06	1.07371
213716_s_at	1.33e-07	1.07282	SECTM1
202731_at	4.94e-05	1.07281	MIR4680///PDCD4
217542_at	2.7e-16	1.07278	MDM2
221345_at	1.12e-06	1.07271	FFAR2
202509_s_at	1.01e-09	1.07191	TNFAIP2
211470_s_at	0.0146	1.07188	SULT1C2
205758_at	7.64e-07	1.07188	CD8A
205051_s_at	3.4e-05	1.07182	KIT
219077_s_at	1.41e-07	1.07182	WWOX
218352_at	7.6e-06	1.07175	RCBTB1
212735_at	1.25e-17	1.07125	RUBCN
214264_s_at	3.16e-09	1.07046	EFCAB11
203002_at	1.86e-06	1.0699	AMOTL2
204151_x_at	0.000613	1.06947	AKR1C1
205617_at	1.84e-15	1.06906	PRRG2
203298_s_at	3.74e-09	1.06834	JARID2
219891_at	7.54e-12	1.06825	PGPEP1
204532_x_at	0.00195	1.06823	UGT1A1///UGT1A4///UGT1A9///UGT1A6///UGT1A8///UGT1A10
204988_at	0.000582	1.06763	FGB
203218_at	1.11e-08	1.06757	MAPK9
203892_at	0.000749	1.06729	WFDC2
213038_at	2.09e-07	1.06664	RNF19B
209221_s_at	3.68e-13	1.06657	OSBPL2
213036_x_at	1.43e-05	1.06624	ATP2A3
219704_at	4.77e-10	1.06599	YBX2
210873_x_at	1.61e-05	1.06586	APOBEC3A_B///APOBEC3A
222372_at	6.19e-06	1.0655	MAGI1
204267_x_at	1.69e-14	1.06527	PKMYT1
211737_x_at	0.000297	1.0651	PTN
37462_i_at	2.43e-09	1.06463	SF3A2
204655_at	2.98e-05	1.06381	CCL5
214718_at	8.92e-07	1.06378	GATAD1
214315_x_at	1.5e-06	1.06315	CALR
212823_s_at	2.51e-12	1.06283	PLEKHG3
210184_at	7.99e-09	1.06238	ITGAX
200731_s_at	1.87e-09	1.0614	PTP4A1
209301_at	0.0102	1.05954	CA2
205927_s_at	0.00556	1.05876	CTSE
209500_x_at	6.07e-07	1.05871	TNFSF12-TNFSF13///TNFSF13
211654_x_at	0.00129	1.05864	HLA-DQB1
205463_s_at	7.91e-07	1.05823	PDGFA
219125_s_at	1.51e-12	1.05803	SLC50A1
214755_at	7.18e-09	1.05762	UAP1L1
203914_x_at	0.011	1.05734	HPGD
203984_s_at	4.78e-13	1.05646	CASP9
209916_at	3.02e-09	1.05583	DHTKD1
205653_at	3.71e-15	1.0558	CTSG
215568_x_at	2.02e-15	1.05566	LYPLA2
216025_x_at	0.000299	1.05564	CYP2C9
206558_at	2.77e-08	1.05557	SIM2
214241_at	5.46e-10	1.05474	NDUFB8
220641_at	1.24e-11	1.05398	NOX5
214835_s_at	5.86e-06	1.05369	SUCLG2
203503_s_at	2.37e-14	1.05367	PEX14
211563_s_at	0.000381	1.05183	URI1
202929_s_at	1.76e-10	1.05102	DDTL///DDT
219727_at	0.0143	1.05082	DUOX2
206011_at	1.39e-05	1.05026	CASP1
220338_at	7.95e-08	1.05006	RALGPS2
216500_at	2.3e-15	1.05005
206641_at	0.00378	1.0498	TNFRSF17
215071_s_at	9.44e-06	1.0495	HIST1H2AC
219195_at	5.98e-10	1.0488	PPARGC1A
209879_at	1.61e-09	1.04844	SELPLG
207717_s_at	0.000617	1.04839	PKP2
206631_at	9.74e-09	1.04818	PTGER2
218085_at	1.14e-06	1.04776	CHMP5
202387_at	1.48e-11	1.04728	BAG1
211598_x_at	2.26e-24	1.04701	VIPR2
216510_x_at	0.00071	1.04684	IGHV3-23///IGHV4-31///IGHM///IGHG1///IGHA1
219946_x_at	1.22e-07	1.04586	MYH14
209772_s_at	5.84e-05	1.04583	CD24
218137_s_at	2.06e-10	1.04542	SMAP1
208715_at	4.01e-11	1.04486	TMCO1
209378_s_at	7.91e-11	1.04445	CCSER2
211495_x_at	2.38e-08	1.04417	TNFSF12-TNFSF13///TNFSF13
215867_x_at	0.000129	1.04378	CA12
201849_at	0.00163	1.04374	BNIP3
211506_s_at	0.0325	1.04347	CXCL8
207325_x_at	0.000292	1.04308	MAGEA1
206539_s_at	1.73e-06	1.04302	CYP4F12
213839_at	8.5e-07	1.04243	CLMN
221866_at	5.9e-13	1.04235	TFEB
204419_x_at	6.08e-05	1.04229	HBG2///HBG1
211071_s_at	0.0015	1.04216	MLLT11
208184_s_at	1.5e-17	1.04214	LOC102724200///TRAPPC10
217485_x_at	2.31e-15	1.04153	PMS2P1
208650_s_at	0.000257	1.04139	CD24
218999_at	1.35e-07	1.0394	TMEM140
202768_at	1.42e-10	1.03909	FOSB
218812_s_at	5.62e-17	1.03907	ORAI2
212223_at	1.17e-08	1.03884	IDS
221133_s_at	0.0336	1.0385	CLDN18
218420_s_at	9.24e-10	1.03842	PROSER1
210606_x_at	4.06e-11	1.03766	KLRD1
212216_at	5.78e-07	1.03763	PREPL
204037_at	1.73e-10	1.03763	LPAR1
221497_x_at	1.51e-09	1.0374	EGLN1
214433_s_at	0.000105	1.03727	SELENBP1
205049_s_at	9.13e-06	1.03714	CD79A
214131_at	0.000256	1.03703	TXLNGY
204457_s_at	0.00184	1.03685	GAS1
209522_s_at	7.46e-09	1.03553	CRAT
203453_at	0.00132	1.03549	SCNN1A
202497_x_at	0.000967	1.03477	SLC2A3
220987_s_at	8e-07	1.03472	NUAK2///AKIP1
210582_s_at	6.17e-15	1.03448	LIMK2
211766_s_at	3.76e-05	1.03448	PNLIPRP2
205632_s_at	0.000151	1.03406	PIP5K1B
206082_at	1.5e-05	1.03398	HCP5
213836_s_at	8.56e-09	1.03378	WIPI1
209795_at	3.78e-06	1.03377	CD69
218245_at	4.06e-13	1.03362	TSKU
205102_at	2.05e-11	1.03309	TMPRSS2
211624_s_at	4.85e-19	1.03275	DRD2
205456_at	1.13e-10	1.03265	CD3E
204181_s_at	1.32e-10	1.03228	ZBTB43
210253_at	2.71e-11	1.03208	HTATIP2
204951_at	2.31e-06	1.03197	RHOH
206522_at	9.61e-05	1.03165	MGAM
213110_s_at	0.000408	1.03103	COL4A5
208915_s_at	1.6e-18	1.03087	GGA2
210469_at	2.29e-14	1.03085	DLG5
204448_s_at	7.11e-16	1.03079	PDCL
203116_s_at	5.98e-11	1.03017	FECH
202053_s_at	1.39e-08	1.02984	ALDH3A2
205502_at	2.05e-07	1.0297	CYP17A1
203456_at	9.64e-10	1.02906	PRAF2
204508_s_at	8.65e-06	1.02894	CA12
50221_at	4.68e-10	1.02888	TFEB
214173_x_at	0.00016	1.02886	URI1
214088_s_at	5.34e-05	1.02883	FUT3
203277_at	7.68e-09	1.02746	DFFA
209699_x_at	0.00308	1.02688	LOC101930400///AKR1C2
220528_at	1.99e-08	1.02642	VNN3
220373_at	1.67e-17	1.02614	DCHS2
219236_at	2.52e-14	1.02449	PAQR6
215949_x_at	6.83e-07	1.0242	IGHM
219028_at	2.98e-08	1.02406	HIPK2
213066_at	5.16e-15	1.02306	RUSC2
216843_x_at	1.37e-12	1.02267	PMS2P1
220421_at	0.00147	1.02205	BTNL8
211650_x_at	0.000102	1.02163	IGHV3-23///IGHV4-31///IGHM///IGHG3///IGHG1///IGHD///IGHA1///IGH
208300_at	8.02e-05	1.02126	PTPRH
208268_at	0.0036	1.021	ADAM28
214303_x_at	0.0292	1.02086	MUC5AC
213336_at	3.31e-13	1.02045	BAZ1B
213878_at	1.93e-06	1.0203	PYROXD1
211881_x_at	0.000255	1.02014	IGLJ3
202500_at	2.03e-12	1.02012	DNAJB2
203834_s_at	4.38e-12	1.01986	TGOLN2
215913_s_at	6.82e-06	1.01983	GULP1
219802_at	0.000207	1.01978	PYROXD1
212923_s_at	3.84e-09	1.019	PXDC1
214637_at	1.05e-09	1.01898	OSM
210539_at	1.06e-18	1.01898	TTLL5
215491_at	1.03e-18	1.01885	MYCL
207907_at	7.29e-08	1.01837	TNFSF14
208488_s_at	1.75e-22	1.01825	CR1
217219_at	5.69e-17	1.0178	DKFZP434A062
202054_s_at	1.92e-07	1.01762	ALDH3A2
220354_at	5.81e-11	1.01755	MCF2L-AS1
211798_x_at	0.000721	1.0173	IGLJ3
222167_at	1.7e-08	1.01693
214121_x_at	1.51e-13	1.01686	PDLIM7
209354_at	7.89e-10	1.01621	TNFRSF14
209364_at	1.29e-10	1.01588	BAD
203167_at	1.79e-06	1.01459	TIMP2
211458_s_at	2.94e-06	1.01455	GABARAPL3///GABARAPL1
212683_at	5.36e-14	1.01409	SLC25A44
214964_at	6.91e-09	1.01404
203591_s_at	3.83e-05	1.01347	CSF3R
209515_s_at	3.75e-05	1.01332	RAB27A
219371_s_at	1.75e-05	1.0127	KLF2
221125_s_at	1.57e-13	1.01267	KCNMB3
212616_at	3.79e-07	1.01222	CHD9
211499_s_at	1.52e-15	1.01178	MAPK11
203708_at	0.000281	1.01167	PDE4B
206211_at	0.00197	1.01161	SELE
221217_s_at	1.08e-14	1.01111	RBFOX1
211635_x_at	2.81e-05	1.01104	IGHV4-31///IGHM///IGHG4///IGHG3///IGHG1///IGHD///IGHA2///IGHA1
AFFX-HUMISGF3A/M97935_MB_at	4.2e-05	1.01045	STAT1
202391_at	0.000369	1.01029	BASP1
209170_s_at	2.71e-05	1.01023	GPM6B
201535_at	2.61e-06	1.01003	UBL3
209121_x_at	3.32e-08	1.00992	NR2F2
215006_at	5.51e-08	1.00991
215888_at	2.08e-06	1.00947	PDS5B
219298_at	9.01e-05	1.00875	ECHDC3
216995_x_at	1.17e-21	1.00809	MKRN2
209878_s_at	2.74e-14	1.00781	RELA
204158_s_at	1.35e-07	1.00765	TCIRG1
222234_s_at	2.24e-15	1.00759	DBNDD1
209499_x_at	4.08e-06	1.00753	TNFSF12-TNFSF13///TNFSF13
207938_at	1.42e-16	1.00624	PI15
213584_s_at	1.07e-12	1.00566	CREBZF
216138_at	2.39e-12	1.00565
209912_s_at	2.54e-10	1.00543	MIR4656///AP5Z1
206271_at	0.000115	1.00542	TLR3
221880_s_at	3.44e-10	1.00485	FAM174B
211026_s_at	0.000147	1.00462	MGLL
201794_s_at	1.43e-09	1.00394	SMG7
206262_at	0.0316	1.00343	ADH1C
203474_at	0.000198	1.0031	IQGAP2
206687_s_at	4.47e-12	1.00257	PTPN6
207356_at	0.00347	1.00233	DEFB4B///DEFB4A
203896_s_at	0.000346	1.00196	PLCB4
204007_at	0.000782	1.00173	FCGR3B
200856_x_at	7.32e-09	1.00163	NCOR1
204425_at	7.54e-12	1.00149	ARHGAP4
206618_at	5.33e-09	1.00148	IL18R1
218411_s_at	5.21e-08	1.00148	MBIP
214767_s_at	3.01e-10	1.00064	HSPB6
208092_s_at	4.28e-07	1.0006	FAM49A
212599_at	3.63e-05	1.00054	AUTS2
202513_s_at	3.66e-15	1.0005	PPP2R5D
201044_x_at	1.91e-10	1.00017	DUSP1
210845_s_at	1.65e-05	1.00004	PLAUR
209552_at	2.78e-11	0.999877	PAX8
213875_x_at	1.7e-06	0.999652	C6orf62
209403_at	2.06e-07	0.999514	TBC1D3I///TBC1D3E///LOC101060389///TBC1D3L///TBC1D3K///TBC1D3G///TBC1D3H///TBC1D3///TBC1D3C///TBC1D3F
201404_x_at	6.84e-13	0.999383	PSMB2
203904_x_at	1.1e-11	0.999297	CD82
211372_s_at	0.0082	0.999296	IL1R2
201510_at	1.31e-06	0.999273	ELF3
220739_s_at	9.95e-11	0.999199	CNNM3
216347_s_at	1.86e-14	0.999185	PPP1R13B
202062_s_at	7.79e-08	0.998833	SEL1L
217281_x_at	0.000302	0.998406	LOC102725526///IGHV4-31///IGHM///IGHG3///IGHG2///IGHG1///IGHA2///IGHA1///IGH
213779_at	1.87e-11	0.997826	EMID1
211043_s_at	1.66e-07	0.997606	CLTB
206284_x_at	9.73e-07	0.997457	CLTB
50965_at	9.73e-11	0.997332	RAB26
218017_s_at	4.46e-10	0.996749	HGSNAT
212950_at	0.00025	0.996546	ADGRF5
204745_x_at	0.000466	0.996363	MT1G
218931_at	3.92e-10	0.996277	RAB17
218236_s_at	9.3e-06	0.996169	PRKD3
203029_s_at	0.000124	0.996098	PTPRN2
218251_at	1.06e-09	0.995987	MID1IP1
204930_s_at	3.61e-18	0.995925	BNIP1
205776_at	0.00172	0.995798	FMO5
209230_s_at	2.01e-05	0.995115	NUPR1
219093_at	8.79e-08	0.994702	PID1
211234_x_at	1.47e-20	0.994431	ESR1
214617_at	8.67e-09	0.994064	PRF1
204137_at	6.03e-07	0.994047	GPR137B
202620_s_at	0.000623	0.994005	PLOD2
201203_s_at	3.32e-07	0.993643	RRBP1
211503_s_at	3.54e-07	0.99347	RAB14
205147_x_at	1.5e-10	0.993226	NCF4
204009_s_at	8.26e-07	0.993195	KRAS
211796_s_at	0.000134	0.992989	TRBC1
217739_s_at	1.83e-06	0.992707	NAMPT
212666_at	8.88e-09	0.9927	SMURF1
221947_at	8.15e-12	0.992609	IL17RC
206123_at	2.99e-08	0.992283	LLGL1
203335_at	2.97e-05	0.992147	PHYH
214963_at	1.06e-14	0.99194	NUP160
203132_at	1.49e-06	0.991906	RB1
208250_s_at	0.0389	0.990467	DMBT1
218294_s_at	8.53e-06	0.990152	NUP50
210768_x_at	6.8e-12	0.990053	TMCO1
213977_s_at	4.82e-13	0.989526	CIZ1
213106_at	8.22e-05	0.989515	ATP8A1
205255_x_at	3.59e-11	0.989508	TCF7
208037_s_at	1.79e-10	0.989428	MADCAM1
221841_s_at	0.000247	0.9879	KLF4
206768_at	7.76e-13	0.987789	RPL3L
214157_at	0.000198	0.987398	GNAS
212400_at	6.07e-09	0.987283	FAM102A
216092_s_at	6.41e-06	0.987227	SLC7A8
219641_at	3.98e-11	0.987182	DET1
220377_at	1.18e-10	0.987023	FAM30A
222375_at	1.47e-10	0.986751
208928_at	3.5e-08	0.986343	POR
220279_at	9.84e-11	0.986212	TRIM17
208632_at	5.57e-13	0.986088	RNF10
206515_at	0.000159	0.985952	CYP4F3
208084_at	1.2e-07	0.985701	LOC100505984///ITGB6
212265_at	4.23e-05	0.985615	QKI
213432_at	0.00559	0.985457	MUC5B
204608_at	4.12e-07	0.985354	ASL
204491_at	5.58e-08	0.984938	PDE4D
203476_at	7.32e-06	0.984567	TPBG
213915_at	1.63e-06	0.984488	NKG7
215608_at	2.74e-14	0.984446
201489_at	1.69e-08	0.984256	PPIF
203801_at	6.11e-14	0.984152	MRPS14
221882_s_at	2.56e-09	0.983932	TMEM8A
208748_s_at	2.84e-12	0.983913	FLOT1
214135_at	0.0196	0.98346	CLDN18
213248_at	1.4e-08	0.983139	LOC730101
214746_s_at	4.25e-12	0.983125	ZNF467
205021_s_at	2.09e-09	0.982971	FOXN3
214385_s_at	0.0472	0.982955	MUC5AC
218024_at	5.69e-10	0.982816	MPC1
209176_at	7.1e-13	0.98255	SEC23IP
202284_s_at	4.89e-08	0.981927	CDKN1A
215779_s_at	1.32e-06	0.981688	HIST1H2BJ///HIST1H2BG
203425_s_at	1.85e-10	0.981628	IGFBP5
212956_at	0.000108	0.981566	TBC1D9
211475_s_at	6.94e-10	0.981542	BAG1
46256_at	1.26e-14	0.981305	SPSB3
210317_s_at	0.000464	0.981267	YWHAE
203836_s_at	3.33e-07	0.980859	MAP3K5
210962_s_at	1.16e-08	0.980809	AKAP9
221344_at	1.09e-27	0.980702	OR12D2
216248_s_at	1.89e-06	0.980414	NR4A2
203054_s_at	1.71e-10	0.980254	TCTA
201813_s_at	1.26e-07	0.98001	TBC1D5
218019_s_at	8.46e-10	0.97973	PDXK
203355_s_at	0.00199	0.979426	PSD3
204284_at	4.39e-07	0.97886	PPP1R3C
40284_at	6.93e-05	0.97867	FOXA2
202912_at	5.43e-05	0.97791	ADM
209648_x_at	8.54e-11	0.977545	SOCS5
202028_s_at	8.31e-06	0.977526	RPL38
208063_s_at	0.00565	0.977496	CAPN9
202314_at	0.000397	0.977208	LRRD1///CYP51A1
202449_s_at	1.55e-09	0.976896	RXRA
210710_at	4.4e-13	0.976402	AGGF1
214446_at	3.7e-08	0.976058	ELL2
213538_at	2.26e-17	0.976045	SON
205935_at	2.58e-05	0.975885	FOXF1
207722_s_at	1.9e-12	0.975783	BTBD2
221636_s_at	2.95e-07	0.975684	2018-03-02
201916_s_at	6.16e-09	0.975462	SEC63
202481_at	1.4e-06	0.975447	DHRS3
212748_at	1.49e-14	0.975397	MKL1
213212_x_at	3.85e-05	0.975362	LOC102724093///GOLGA6L4///GOLGA6L9///GOLGA6L5P
208837_at	5.69e-08	0.975216	TMED3
203950_s_at	5.84e-14	0.97495	CLCN6
207075_at	7.11e-08	0.974928	NLRP3
217992_s_at	1.12e-06	0.974672	EFHD2
212437_at	1.03e-08	0.974659	CENPB
204454_at	2.14e-09	0.974595	LDOC1
221978_at	7.39e-06	0.97412	HLA-F
203523_at	2.73e-09	0.97398	LSP1
204367_at	3.55e-12	0.973932	SP2
220751_s_at	3.53e-10	0.973766	FAXDC2
212193_s_at	6.35e-05	0.973751	LARP1
217729_s_at	8.45e-11	0.973732	AES
213033_s_at	3.1e-09	0.973486	NFIB
203154_s_at	3.4e-10	0.97294	PAK4
214116_at	2.86e-10	0.97288	BTD
212013_at	0.000966	0.972676	PXDN
213674_x_at	9.52e-05	0.972589	IGHD
203673_at	3.13e-13	0.972313	TG
220351_at	0.00221	0.972272	ACKR4
202688_at	0.00138	0.972162	TNFSF10
219434_at	0.000302	0.971965	TREM1
205172_x_at	8.66e-08	0.971886	CLTB
204240_s_at	2.21e-05	0.971814	SMC2
222165_x_at	2.6e-09	0.971773	C9orf16
218212_s_at	1.39e-07	0.971635	MOCS2
205817_at	1.27e-09	0.971323	SIX1
213400_s_at	2.52e-06	0.971228	TBL1X
213832_at	2.49e-07	0.971149	KCND3
213524_s_at	0.00469	0.969987	G0S2
209425_at	0.000596	0.968969	C1QTNF3-AMACR///AMACR
206472_s_at	1.67e-09	0.968951	TLE3
208127_s_at	6.8e-10	0.968936	SOCS5
209778_at	4.46e-09	0.968908	TRIP11
206770_s_at	3.46e-05	0.968742	SLC35A3
220323_at	5.81e-12	0.968681	CNTD2
201963_at	2.97e-05	0.968659	ACSL1
207063_at	7.01e-07	0.968466	TTTY14
202889_x_at	7.07e-09	0.968202	MAP7
215852_x_at	1.17e-16	0.968142	SOGA1
219739_at	2.01e-05	0.968124	RNF186
220542_s_at	4.26e-08	0.967837	BPIFA1
200719_at	1.56e-06	0.967731	SKP1
206272_at	2.48e-06	0.967366	SPHAR///RAB4A
204624_at	8.15e-05	0.967052	ATP7B
209409_at	8.21e-07	0.96698	GRB10
204900_x_at	4.42e-07	0.966697	SAP30
213567_at	2.78e-10	0.966694	KPNA4
214808_at	2.67e-10	0.966582
203079_s_at	1.56e-08	0.966062	CUL2
210377_at	2.03e-05	0.965652	ACSM3
202059_s_at	1.64e-08	0.965497	KPNA1
207071_s_at	6.47e-10	0.965417	ACO1
216789_at	8.2e-16	0.965364	TMEM92-AS1
211588_s_at	1.69e-14	0.965204	PML
216207_x_at	0.00142	0.965161	IGKC
210344_at	3.17e-16	0.965127	OSBPL7
34406_at	2.08e-16	0.965015	PACS2
206380_s_at	5.6e-13	0.964794	CFP
218359_at	2.68e-13	0.964727	NRSN2
216082_at	9.01e-12	0.964311	NEU3
220093_at	1.79e-16	0.964266	ANTXR1
213024_at	1.69e-05	0.964239	TMF1
204189_at	2.12e-12	0.963419	RARG
215574_at	1.15e-14	0.963346
209824_s_at	9.25e-13	0.963343	ARNTL
218380_at	5.68e-06	0.963313	LOC728392
216525_x_at	1.77e-12	0.963078	PMS2P3
210314_x_at	1.5e-05	0.962977	TNFSF13
215735_s_at	1.16e-09	0.962968	TSC2
204502_at	4.75e-07	0.962846	SAMHD1
221690_s_at	0.0351	0.962503	NLRP2
205312_at	3.56e-11	0.96242	SPI1
218311_at	2.64e-05	0.9621	MAP4K3
203769_s_at	2.15e-06	0.962046	STS
219633_at	3.87e-08	0.961927	TTPAL
202693_s_at	1.51e-07	0.961811	STK17A
221379_at	6.47e-12	0.961574
205842_s_at	7.58e-05	0.961533	JAK2
203574_at	2.99e-06	0.961306	NFIL3
217157_x_at	0.000307	0.961111	IGK///IGKC
210958_s_at	1.83e-10	0.96069	MAST4
209453_at	2.53e-06	0.960668	SLC9A1
204852_s_at	8.05e-12	0.960616	PTPN7
203775_at	1.94e-08	0.960395	SLC25A13
204883_s_at	1.46e-12	0.960347	HUS1
205652_s_at	1.05e-13	0.960035	TTLL1
202536_at	1.33e-05	0.959846	CHMP2B
219460_s_at	2.84e-14	0.959564	TMEM127
35776_at	1.55e-12	0.959533	ITSN1
202628_s_at	0.000977	0.959297	SERPINE1
204077_x_at	8.43e-11	0.959077	ENTPD4
204925_at	5.33e-12	0.958984	CTNS
205863_at	0.000551	0.958683	S100A12
220613_s_at	0.000403	0.958394	SYTL2
210538_s_at	0.000314	0.958271	BIRC3
216981_x_at	1.26e-12	0.95794	SPN
216791_at	1.81e-13	0.957914
211634_x_at	0.000858	0.957382	IGHM
209217_s_at	1.85e-11	0.957255	WDR45
212495_at	7.65e-14	0.957176	KDM4B
202723_s_at	1.13e-05	0.95712	FOXO1
212459_x_at	5.7e-06	0.956914	SUCLG2
208866_at	1.39e-06	0.956456	CSNK1A1
47571_at	1.79e-08	0.956302	ZNF236
214596_at	9.32e-07	0.956127	CHRM3
205488_at	0.000848	0.956112	GZMA
213689_x_at	4.96e-05	0.956058	FAM69A
215153_at	6.46e-13	0.955855	NOS1AP
210164_at	0.000429	0.95577	GZMB
215054_at	9.42e-16	0.955717	RGL3///EPOR
216766_at	3.11e-05	0.955637
219850_s_at	0.00104	0.955629	EHF
212648_at	1.37e-09	0.955618	DHX29
217312_s_at	2.97e-05	0.955478	COL7A1
206044_s_at	1.07e-10	0.955473	KIAA1549///BRAF
209594_x_at	3.16e-11	0.955206	PSG9
205749_at	7.35e-11	0.955198	CYP1A1
216661_x_at	0.000338	0.954963	CYP2C9
208135_at	3.02e-13	0.954863	HNF1B
205821_at	1.27e-07	0.954783	KLRC4-KLRK1///KLRK1
218660_at	1.2e-08	0.954712	DYSF
217183_at	4.9e-12	0.954212	SPC24
205640_at	3.23e-07	0.954015	ALDH3B1
203937_s_at	2.08e-16	0.95393	TAF1C
215435_at	6.15e-09	0.95367
216883_x_at	1.77e-12	0.953369	PDE6D
213181_s_at	2.44e-10	0.953348	MOCS1
214696_at	1.67e-06	0.95332	MIR22///MIR22HG
202464_s_at	1.69e-06	0.953281	PFKFB3
211535_s_at	2.78e-06	0.953213	FGFR1
205066_s_at	3.09e-10	0.953069	ENPP1
205982_x_at	1.41e-14	0.952955	SFTPC
207695_s_at	6.37e-18	0.952873	IGSF1
58916_at	0.00113	0.952833	NDUFC2-KCTD14///KCTD14
208510_s_at	4.53e-05	0.952758	PPARG
204748_at	0.0243	0.952738	PTGS2
203279_at	3.84e-12	0.952609	EDEM1
215792_s_at	1.18e-12	0.952369	DNAJC11
217707_x_at	4.26e-06	0.952366	SMARCA2
222217_s_at	3.82e-06	0.952335	SLC27A3
210589_s_at	2.74e-11	0.952237	GBAP1
212959_s_at	4.27e-07	0.952153	GNPTAB
214574_x_at	2.82e-08	0.951959	LST1
31637_s_at	3.83e-10	0.951694	NR1D1///THRA
203225_s_at	2.51e-07	0.951591	RFK
38340_at	6.51e-10	0.951317	HIP1R
217738_at	1.66e-06	0.951252	NAMPT
201490_s_at	1.08e-05	0.951124	PPIF
212335_at	8.52e-06	0.95111	GNS
202643_s_at	7.39e-05	0.950505	TNFAIP3
205654_at	0.000201	0.950199	C4BPA
202558_s_at	6.27e-07	0.950004	HSPA13
221751_at	2.01e-08	0.949999	PANK3
203353_s_at	1.79e-11	0.949913	MBD1
204881_s_at	0.000143	0.949894	UGCG
206873_at	6.16e-07	0.949751	CA6
216920_s_at	1.21e-05	0.949577	TARP///TRGV9///TRGC2
202426_s_at	2.89e-13	0.949207	RXRA
209328_x_at	5.69e-21	0.949052	HIGD2A
221215_s_at	1.02e-08	0.949023	RIPK4
211302_s_at	0.000238	0.949009	PDE4B
217187_at	0.00231	0.948927	MUC5AC
203648_at	2.51e-15	0.948798	TATDN2
203486_s_at	8.89e-12	0.948613	ARMC8
205008_s_at	6.43e-07	0.948548	CIB2
212902_at	4.96e-07	0.948385	SEC24A
211644_x_at	0.00991	0.948364	IGK///IGKC
207981_s_at	0.00352	0.948363	ESRRG
212409_s_at	2.7e-09	0.947965	TOR1AIP1
209037_s_at	2.2e-08	0.947939	EHD1
40850_at	6.08e-10	0.947855	FKBP8
204986_s_at	1.45e-11	0.947598	TAOK2
201169_s_at	4.64e-07	0.947453	BHLHE40
214925_s_at	1.63e-08	0.947307	SPTAN1
218769_s_at	2.76e-11	0.947218	ANKRA2
209188_x_at	7.25e-09	0.947136	DR1
200649_at	1.24e-09	0.946776	NUCB1
205344_at	2.75e-11	0.946768	CSPG5
34031_i_at	4.49e-05	0.946345	KRIT1
222186_at	7.14e-06	0.94622
220941_s_at	4e-10	0.946092	C21orf91
209426_s_at	0.000347	0.94564	C1QTNF3-AMACR///AMACR
201283_s_at	1.51e-07	0.945612	TRAK1
218834_s_at	1.49e-07	0.945572	TMEM132A
216484_x_at	2.83e-17	0.945559
217591_at	4.57e-05	0.945244	SKIL
206183_s_at	1.76e-18	0.945211	LOC101929134///HERC3
203860_at	3.51e-06	0.945051	PCCA
221929_at	4.29e-13	0.945048
212205_at	2.41e-08	0.944834	H2AFV
204269_at	2.93e-10	0.944803	PIM2
207017_at	9.16e-07	0.944708	RAB27B
213768_s_at	2.57e-10	0.944605	ASCL1
219711_at	1.87e-10	0.94422	ZNF586
222115_x_at	2.82e-20	0.944123	GLYR1
207047_s_at	1.82e-16	0.943888	CLCNKB///CLCNKA
205999_x_at	4.33e-05	0.943865	CYP3A4
216922_x_at	0.0472	0.9438	DAZ4///DAZ2///DAZ3///DAZ1
206180_x_at	6.31e-11	0.94372	ZNF747
215322_at	2.17e-10	0.94368	LONRF1
219706_at	1.6e-13	0.943647	AP5S1
216594_x_at	0.000689	0.943618	AKR1C1
214785_at	1.46e-05	0.94284	VPS13A
49327_at	2.77e-16	0.942833	SIRT3
213502_x_at	2.54e-05	0.942809	GUSBP11
202685_s_at	2.66e-11	0.94279	AXL
215498_s_at	4.67e-07	0.942371	LOC100996792///MAP2K3
218050_at	4.54e-11	0.942352	UFM1
218952_at	3.54e-05	0.942196	PCSK1N
212968_at	6.84e-12	0.941764	RFNG
54970_at	3.67e-10	0.941543	ZMIZ2
212635_at	4.25e-09	0.941463	TNPO1
204693_at	1.26e-06	0.941209	CDC42EP1
207126_x_at	0.00768	0.941168	UGT1A1///UGT1A4///UGT1A9///UGT1A6///UGT1A8///UGT1A10
219551_at	2.96e-06	0.94115	EAF2
205100_at	1.21e-05	0.940933	GFPT2
206049_at	3.21e-08	0.940887	SELP
206617_s_at	1.81e-11	0.940669	RENBP
212206_s_at	1.07e-10	0.940433	H2AFV
204136_at	0.000814	0.940397	COL7A1
209459_s_at	0.00469	0.940373	ABAT
206635_at	8.85e-14	0.940245	CHRNB2
204618_s_at	1.58e-11	0.940143	GABPB1
218986_s_at	0.00379	0.940044	DDX60
211534_x_at	3.51e-15	0.939943	PTPRN2
202193_at	6.28e-10	0.939725	LIMK2
205161_s_at	2.56e-11	0.939661	PEX11A
216646_at	2.21e-15	0.939415	DSCC1
221418_s_at	6.8e-10	0.939326	MED16
206798_x_at	2.76e-09	0.939057	DLEC1
205220_at	0.0307	0.939027	HCAR3
213693_s_at	0.000165	0.938949	MUC1
207746_at	3.57e-06	0.938751	POLQ
212559_at	4.48e-10	0.938668	PRKAR1B
213629_x_at	0.000406	0.938639	MT1F
206924_at	0.00972	0.938421	IL11
208377_s_at	7.25e-11	0.938277	CACNA1F
219377_at	2.66e-05	0.938269	GAREM1
208530_s_at	1.42e-15	0.938009	RARB
219260_s_at	5.29e-05	0.937884	ELP5
201776_s_at	9.78e-08	0.937874	EFCAB14
216370_s_at	2.78e-05	0.937852	TKTL1
213837_at	2.71e-18	0.937723	L3MBTL1
203182_s_at	2.35e-08	0.937639	SRPK2
220815_at	4.61e-18	0.93756	CTNNA3
218720_x_at	6.84e-08	0.937321	SEZ6L2
203827_at	6.05e-07	0.93721	WIPI1
213771_at	7.14e-12	0.937058	IRF2BP1
213275_x_at	2.02e-07	0.936878	CTSB
203014_x_at	6.51e-10	0.936809	SGSM3
202187_s_at	2.37e-12	0.936795	PPP2R5A
208470_s_at	5.9e-07	0.936795	HPR///HP
218765_at	1.17e-10	0.936513	SIDT2
214412_at	6.6e-10	0.936391	H2AFB1///H2AFB2///H2AFB3
202254_at	1.29e-10	0.936364	SIPA1L1
204671_s_at	0.00114	0.936264	ANKRD6
206429_at	2.38e-05	0.936064	F2RL1
202263_at	4.83e-07	0.935951	CYB5R1
220926_s_at	5.87e-05	0.935921	EDEM3
218875_s_at	1.62e-07	0.935916	FBXO5
210981_s_at	1.41e-14	0.935714	GRK6
205470_s_at	0.000304	0.935683	KLK11
206546_at	2.41e-06	0.935572	SYCP2
218777_at	6.58e-13	0.935411	REEP4
207351_s_at	4.23e-11	0.934981	SH2D2A
209119_x_at	1.65e-07	0.93468	NR2F2
205267_at	0.00993	0.934461	POU2AF1
214934_at	0.00014	0.934458	ATP9B
219054_at	3.07e-13	0.934398	NPR3
204774_at	4.82e-05	0.934232	EVI2A
202537_s_at	2.5e-06	0.933805	CHMP2B
221710_x_at	7.46e-11	0.933269	EVA1B
203128_at	3.12e-08	0.933102	SPTLC2
201983_s_at	0.00803	0.933085	EGFR
209105_at	4.48e-12	0.933081	NCOA1
212775_at	0.00238	0.932791	OBSL1
215195_at	1.79e-08	0.932752	PRKCA
215310_at	5.12e-13	0.932667	APC
213826_s_at	1.03e-07	0.93238	H3F3A
217557_s_at	2.82e-21	0.932368	CPM
212659_s_at	0.000128	0.932201	IL1RN
221589_s_at	0.000638	0.932118	ALDH6A1
218643_s_at	1.8e-08	0.931818	CRIPT
206056_x_at	4.19e-15	0.931785	SPN
218090_s_at	2.14e-07	0.9317	WDR11
200884_at	0.000566	0.931299	CKB
203710_at	2.89e-05	0.93128	ITPR1
201640_x_at	5.85e-12	0.931196	CLPTM1
218517_at	2.51e-09	0.930927	JADE1
209193_at	9.85e-11	0.930883	PIM1
208186_s_at	2.61e-08	0.930834	LIPE
217867_x_at	0.000262	0.930713	BACE2
215116_s_at	8.6e-05	0.930513	DNM1
208651_x_at	5.88e-06	0.930379	CD24
201851_at	3.28e-15	0.930364	SH3GL1
220166_at	4.13e-17	0.930299	CNNM1
218217_at	2.15e-07	0.930252	SCPEP1
204079_at	1.43e-09	0.930161	TPST2
219505_at	2.7e-05	0.93003	CECR1
202722_s_at	1.47e-07	0.929885	GFPT1
213766_x_at	9.77e-08	0.929604	GNA11
209401_s_at	1.57e-11	0.929404	SLC12A4
212339_at	1.78e-06	0.929354	EPB41L1
202308_at	3.15e-09	0.929325	SREBF1
209300_s_at	1.52e-08	0.929106	NECAP1
212974_at	2.74e-14	0.928735	DENND3
201057_s_at	2.96e-10	0.928583	GOLGB1
204281_at	5.18e-10	0.928505	TEAD4
212668_at	6.42e-13	0.928475	SMURF1
205965_at	9.26e-10	0.9284	BATF
221188_s_at	4.14e-06	0.928192	CIDEB
221351_at	1.15e-17	0.927902	HTR1A
211527_x_at	7.66e-05	0.927807	VEGFA
212214_at	4.84e-07	0.927542	OPA1
219596_at	1.46e-07	0.927468	THAP10
78047_s_at	9.53e-10	0.927281	MMP24-AS1
202743_at	1.26e-07	0.927022	PIK3R3
210021_s_at	1.65e-10	0.926963	CCNO
220012_at	1.44e-14	0.926699	ERO1B
207949_s_at	8.65e-09	0.926625	ICA1
202923_s_at	9.35e-07	0.926569	GCLC
213643_s_at	7.99e-20	0.926561	INPP5B
211806_s_at	1.73e-06	0.926295	KCNJ15
204434_at	4.02e-10	0.92629	SPATA2
37425_g_at	1.54e-18	0.926216	CCHCR1
202253_s_at	6.91e-09	0.926191	DNM2
201768_s_at	9.52e-09	0.926	CLINT1
218968_s_at	1.49e-07	0.925971	ZFP64
203738_at	5.87e-07	0.925915	C5orf22
220363_s_at	5.57e-12	0.925623	ELMO2
203994_s_at	3.96e-11	0.925159	C21orf2
205146_x_at	8.32e-16	0.924666	APBA3
217618_x_at	3.44e-11	0.924594	HUS1
219998_at	5.03e-11	0.924292	LGALSL
209344_at	4.13e-05	0.924201	TPM4
201353_s_at	4.9e-08	0.923847	BAZ2A
201844_s_at	2.4e-05	0.923825	RYBP
209451_at	2.27e-05	0.923764	TANK
213389_at	7.69e-16	0.923579	ZNF592
214211_at	1.9e-08	0.923555	FTH1
207265_s_at	4.82e-05	0.923376	KDELR3
217167_x_at	4.38e-08	0.923274	GK
203111_s_at	1.7e-14	0.923194	PTK2B
218640_s_at	3.49e-06	0.923022	PLEKHF2
206247_at	1.62e-05	0.922968	MICB
215253_s_at	5.54e-08	0.922742	RCAN1
221511_x_at	1.41e-06	0.922706	DYX1C1-CCPG1///CCPG1
203849_s_at	1.66e-08	0.922703	KIF1A
204088_at	2.36e-07	0.922509	P2RX4
204799_at	5.84e-08	0.922482	ZBED4
61297_at	3.89e-14	0.922398	CASKIN2
219066_at	1.21e-08	0.922199	PPCDC
218193_s_at	8.14e-07	0.921937	GOLT1B
201824_at	9.44e-07	0.921925	RNF14
222240_s_at	1.22e-06	0.921875	ISYNA1
209220_at	0.00296	0.921814	GPC3
200070_at	2.38e-14	0.921495	CNPPD1
205164_at	1.1e-08	0.921338	GCAT
218810_at	7.64e-07	0.921321	MIR6732///ZC3H12A
210975_x_at	8.24e-15	0.921158	FASTK
218523_at	1.12e-10	0.920827	LHPP
211056_s_at	4.69e-08	0.920781	SRD5A1
201669_s_at	4.23e-06	0.92055	MARCKS
210086_at	1.6e-08	0.92045	HR
212286_at	3.53e-07	0.920377	ANKRD12
222057_at	6.64e-16	0.920286	NOL12
213817_at	0.000608	0.920285	IRAK3
212111_at	3.35e-11	0.920116	STX12
33304_at	5.93e-05	0.92004	ISG20
214693_x_at	3.78e-05	0.91993	NBPF26///NBPF10///NBPF9///NBPF14
210795_s_at	1.63e-13	0.919853
219549_s_at	8.42e-07	0.919682	RTN3
203537_at	2.39e-10	0.919636	PRPSAP2
218926_at	3.5e-11	0.919633	MYNN
204371_s_at	1.79e-11	0.919515	KHSRP
208477_at	7.68e-19	0.919458	KCNC1
205452_at	3.41e-10	0.919408	PIGB
206359_at	5.85e-08	0.919373	SOCS3
212651_at	1.22e-05	0.919248	RHOBTB1
210868_s_at	0.000245	0.918715	ELOVL6
214030_at	3.52e-07	0.918654	CRYBG3
205419_at	1.77e-07	0.918447	GPR183
212877_at	1.01e-07	0.918247	KLC1
219184_x_at	1.86e-11	0.918244	TIMM22
213325_at	0.00065	0.917944	NECTIN3
203138_at	7.22e-07	0.917864	HAT1
209462_at	2.09e-10	0.917845	APLP1
215103_at	0.00929	0.917819	CYP2C18
205052_at	2.29e-11	0.917715	AUH
220757_s_at	4.33e-13	0.917582	MIR4746///UBXN6
206117_at	4.1e-07	0.917536	TPM1
222366_at	8.22e-05	0.917318
209970_x_at	6.74e-05	0.917264	CASP1
220342_x_at	0.00019	0.917217	EDEM3
204924_at	4.81e-05	0.917148	TLR2
217790_s_at	2.15e-07	0.916951	SSR3
206421_s_at	0.000276	0.916929	SERPINB7
208784_s_at	6.66e-09	0.916593	KLHDC3
203745_at	2.84e-07	0.916254	HCCS
208874_x_at	1.48e-12	0.916208	PTPA
219691_at	0.000406	0.916177	SAMD9
221932_s_at	8.96e-14	0.916138	GLRX5
203761_at	1.48e-06	0.915855	SLA
203240_at	0.0296	0.915751	FCGBP
217459_at	2.55e-15	0.915624
212989_at	2.93e-06	0.915607	SGMS1
204105_s_at	0.00318	0.915491	NRCAM
219337_at	4.38e-17	0.915254	C1orf159
205237_at	1.81e-07	0.915228	FCN1
207292_s_at	2.44e-13	0.915194	MAPK7
205313_at	1.13e-06	0.915184	HNF1B
218031_s_at	8.19e-06	0.91515	FOXN3
208793_x_at	8.76e-11	0.914923	SMARCA4
204015_s_at	7.02e-05	0.914711	DUSP4
200056_s_at	1.08e-08	0.914591	C1D
208344_x_at	8.56e-12	0.914567	IFNA13///IFNA1
219157_at	7.92e-10	0.914563	KLHL2
212574_x_at	8.26e-09	0.914528	TMEM259
201493_s_at	3.67e-10	0.914251	PUM2
215206_at	0.00159	0.914232
206209_s_at	0.000353	0.914148	CA4
219267_at	2.13e-08	0.914144	GLTP
220553_s_at	3.65e-06	0.914142	PRPF39
211908_x_at	6.48e-06	0.913783	IGK
220426_at	4.16e-13	0.913734	FNDC11
202247_s_at	7.28e-14	0.913719	MTA1
206542_s_at	6.69e-07	0.913714	SMARCA2
266_s_at	0.00019	0.91357	CD24
204209_at	2.87e-13	0.913214	PCYT1A
212964_at	0.00163	0.913205	HIC2
217825_s_at	7.52e-09	0.913054	UBE2J1
220240_s_at	7.21e-07	0.912966	TMCO3
207980_s_at	3.62e-07	0.912891	CITED2
206036_s_at	2.36e-06	0.91289	REL
211144_x_at	4.56e-07	0.912737	TARP///TRGV9///TRGC2
206059_at	0.00339	0.912685	ZNF91
209833_at	1.79e-11	0.912354	CRADD
202252_at	4.19e-12	0.912157	RAB13
212911_at	1.99e-06	0.911966	DNAJC16
219213_at	1.46e-06	0.911477	JAM2
212810_s_at	3.64e-07	0.911381	SLC1A4
215772_x_at	3.24e-06	0.911296	SUCLG2
211640_x_at	4.07e-07	0.911021	IGHM///IGHG1
213970_at	5.04e-13	0.911015	RABL3
202444_s_at	4.2e-06	0.9109	ERLIN1
207853_s_at	1.59e-15	0.910814	SNCB
205746_s_at	5.01e-11	0.910807	ADAM17
220659_s_at	2.25e-12	0.910799	C7orf43
220006_at	1.61e-11	0.910655	EFCC1
220299_at	3.9e-08	0.910647	SPATA6
217419_x_at	1.66e-06	0.910641	AGRN
214164_x_at	0.000446	0.910614	CA12
211464_x_at	1.86e-09	0.910611	CASP6
217770_at	2.56e-08	0.910607	PIGT
214714_at	2.38e-10	0.910497	ZNF394
210508_s_at	7.89e-10	0.910485	KCNQ2
218655_s_at	7.6e-14	0.910461	CWC25
204084_s_at	3.28e-07	0.910445	CLN5
200704_at	2.56e-08	0.91023	LITAF
204233_s_at	2.6e-07	0.910222	CHKA
218813_s_at	3.1e-06	0.909841	SH3GLB2
207405_s_at	4.44e-10	0.909613	RAD17
55692_at	8.97e-08	0.90948	ELMO2
208021_s_at	9.07e-12	0.909207	RFC1
221498_at	4.57e-11	0.909166	SNX27
208918_s_at	3.46e-10	0.909118	NADK
213607_x_at	2.89e-11	0.909032	NADK
205438_at	1.28e-11	0.908925	PTPN21
220293_at	8.84e-05	0.908878	CATSPERB
219783_at	3.59e-14	0.908869	SLC35F6
206099_at	8.28e-14	0.908859	PRKCH
215223_s_at	0.000824	0.908778	LOC100129518///SOD2
208854_s_at	6.58e-09	0.908733	STK24
222333_at	9.3e-09	0.908521	ALS2CL
210935_s_at	5.66e-06	0.908477	WDR1
205434_s_at	9.29e-10	0.908349	AAK1
201236_s_at	1.16e-07	0.908247	BTG2
209950_s_at	0.00696	0.908121	VILL
213506_at	0.000867	0.90801	F2RL1
202764_at	3.06e-14	0.907694	STIM1
219073_s_at	3.67e-06	0.907433	OSBPL10
217966_s_at	7.46e-05	0.90743	FAM129A
212917_x_at	2.12e-06	0.907396	RECQL
202531_at	1.32e-06	0.907356	IRF1
219847_at	1.24e-14	0.907334	HDAC11
214669_x_at	0.000144	0.907174	IGKC
204691_x_at	1.27e-14	0.907034	PLA2G6
209907_s_at	3.64e-09	0.906969	ITSN2
214047_s_at	2.07e-08	0.906963	MBD4
211630_s_at	1.29e-13	0.90694	GSS
219095_at	1.01e-12	0.906849	PLA2G4B///JMJD7-PLA2G4B
221807_s_at	5.3e-09	0.906837	TRABD
219577_s_at	8.54e-12	0.906832	ABCA7
202605_at	1.49e-12	0.906685	GUSB
213504_at	4.55e-09	0.906471	COPS6
217899_at	2.82e-14	0.906461	TMEM214
212151_at	3.31e-05	0.906268	PBX1
204090_at	5.09e-14	0.906005	STK19
201626_at	3.94e-06	0.905891	INSIG1
204159_at	1.13e-05	0.905857	CDKN2C
218843_at	8.52e-11	0.905756	FNDC4
209234_at	3.47e-09	0.905503	KIF1B
207222_at	0.00386	0.904944	LOC100652777///PLA2G10
206829_x_at	2.44e-05	0.904805	ZNF430
61874_at	5.88e-10	0.904204	CACFD1
214456_x_at	0.00722	0.904188	SAA2///SAA1
204872_at	2.69e-06	0.904056	TLE4
221626_at	4.34e-13	0.903973	ZNF506
213358_at	7.55e-05	0.903964	MTCL1
212912_at	5.05e-05	0.903945	RPS6KA2
209093_s_at	5.15e-09	0.903866	GBAP1///GBA
211323_s_at	2.96e-08	0.903731	ITPR1
202970_at	8.54e-13	0.903492	DYRK2
204451_at	1.14e-05	0.90348	FZD1
208165_s_at	9.04e-06	0.903404	PRSS16
205181_at	4.95e-10	0.903401	ZSCAN9
205001_s_at	4.77e-07	0.903325	DDX3Y
218363_at	1.07e-11	0.903144	EXD2
208938_at	6.52e-07	0.903121	PRCC
210947_s_at	5.66e-13	0.903069	MSH3
213872_at	0.00373	0.902959
208961_s_at	1.2e-06	0.902752	KLF6
210401_at	2.06e-15	0.902511	P2RX1
204393_s_at	2.01e-08	0.902407	ACPP
216246_at	2e-06	0.902405
221953_s_at	2.24e-09	0.902343	MMP24-AS1
209286_at	7.13e-05	0.902266	CDC42EP3
208114_s_at	4.08e-08	0.902249	ISG20L2
208962_s_at	0.00137	0.902243	MIR1908///FADS1
216250_s_at	2.14e-05	0.902235	LPXN
212259_s_at	4.09e-10	0.90222	PBXIP1
215387_x_at	2.04e-10	0.902026
203021_at	0.0029	0.902017	SLPI
217164_at	1.81e-06	0.901933
212858_at	3.79e-09	0.901896	PAQR4
204690_at	8.05e-12	0.901846	STX8
201304_at	1.8e-06	0.901828	NDUFA5
211582_x_at	8.79e-07	0.901807	LST1
206231_at	3.08e-13	0.901756	KCNN1
204662_at	2.95e-09	0.90163	CCP110
214321_at	6.5e-07	0.901585	NOV
216668_at	3.58e-13	0.901426
210242_x_at	1.31e-15	0.901404	ST20
214059_at	0.00191	0.901401	IFI44
211639_x_at	1.81e-05	0.901279	IGHV4-31///IGHM///IGHG4///IGHG3///IGHG1///IGHD///IGHA2///IGHA1///IGH
215966_x_at	1.03e-06	0.901052	GK3P
213100_at	1.79e-09	0.900737	UNC5B
215977_x_at	4.55e-06	0.900193	GK
201435_s_at	2.3e-05	0.8999	EIF4E
222245_s_at	0.00035	0.899836	FER1L4
219483_s_at	1.32e-10	0.899744	PORCN
215595_x_at	6.05e-13	0.899645
204994_at	5.54e-05	0.899365	MX2
215633_x_at	7.62e-08	0.89935	LST1
221080_s_at	2.71e-10	0.899347	DENND1C
213518_at	6.76e-05	0.899316	PRKCI
210859_x_at	2.05e-10	0.899294	CLN3
212083_at	1.31e-12	0.899249	TEX261
220412_x_at	2.39e-15	0.899124	KCNK7
212987_at	6.36e-17	0.89901	FBXO9
219397_at	2.56e-10	0.899009	COQ10B
213605_s_at	0.000124	0.898962
201362_at	3.27e-06	0.898795	IVNS1ABP
65630_at	7.07e-11	0.898794	TMEM80
212965_at	3.78e-06	0.898785	HIC2
209650_s_at	2.43e-14	0.898758	TBC1D22A
204613_at	2.45e-08	0.898737	PLCG2
221848_at	7.71e-11	0.898713	ZGPAT
200852_x_at	3.72e-08	0.898439	GNB2
205290_s_at	0.00049	0.898327	BMP2
213931_at	0.000459	0.898246	ID2B///ID2
218169_at	3.01e-09	0.898183	VAC14
211559_s_at	3.75e-07	0.898153	CCNG2
208871_at	2.47e-11	0.89809	ATN1
206983_at	3.62e-10	0.897924	CCR6
213160_at	2.57e-07	0.897828	DOCK2
205681_at	0.00945	0.897704	BCL2A1
216593_s_at	7.17e-08	0.89759	PIGC
218396_at	1.39e-06	0.897575	VPS13C
219336_s_at	4.01e-09	0.897497	ASCC1
215771_x_at	8.17e-08	0.897255	RET
212462_at	1.26e-07	0.897106	KAT6B
46270_at	2.13e-13	0.896796	UBAP1
214779_s_at	1.53e-08	0.896742	SGSM3
37996_s_at	2.58e-11	0.896479	DMPK
31874_at	7.73e-08	0.896464	GAS2L1
211702_s_at	3.2e-11	0.89624	USP32
210031_at	1.34e-08	0.896156	CD247
203924_at	0.0291	0.896133	GSTA1
204518_s_at	2.01e-07	0.896053	PPIC
202083_s_at	2.98e-08	0.895999	SEC14L1
207169_x_at	2.51e-09	0.895932	MIR4640///DDR1
209651_at	0.000217	0.895854	TGFB1I1
209111_at	1.01e-09	0.895847	RNF5P1///RNF5
218198_at	1.5e-13	0.895692	DHX32
218772_x_at	8.1e-07	0.895237	TMEM38B
211742_s_at	0.000636	0.895211	EVI2B
214228_x_at	8.48e-08	0.895205	TNFRSF4
201936_s_at	2.56e-11	0.895003	EIF4G3
219290_x_at	4.78e-11	0.894943	DAPP1
204550_x_at	5.4e-06	0.894899	GSTM1
219690_at	6.05e-10	0.894817	IGFLR1
214076_at	5.25e-14	0.894749	GFOD2
203749_s_at	4.89e-08	0.894748	RARA
217507_at	1.97e-14	0.894387	SLC11A1
221766_s_at	2.07e-06	0.894352	FAM46A
212778_at	2.83e-09	0.89434	PACS2
200739_s_at	1.94e-11	0.894026	SUMO3
221701_s_at	4.7e-06	0.893959	STRA6
205139_s_at	0.000154	0.893939	UST
219159_s_at	5.49e-08	0.893899	SLAMF7
222262_s_at	0.00129	0.893766	ETNK1
209235_at	4.97e-10	0.893722	CLCN7
206861_s_at	5.9e-10	0.893601	CGGBP1
220702_at	1.15e-07	0.893544
213893_x_at	2.09e-09	0.893532	PMS2P9///PMS2P5
212040_at	2.12e-05	0.893513	TGOLN2
202721_s_at	1.49e-07	0.893488	GFPT1
219385_at	6.4e-09	0.893484	SLAMF8
1729_at	2.58e-12	0.893423	TRADD
220668_s_at	0.000535	0.893398	DNMT3B
207442_at	3.88e-05	0.893396	CSF3
218545_at	2.52e-05	0.893167	CCDC91
214326_x_at	1.66e-07	0.893162	JUND
221603_at	4.88e-16	0.892994	PEX16
220079_s_at	3.07e-11	0.892994	USP48
211505_s_at	2.94e-08	0.892933	STAU1
218983_at	5.96e-06	0.892889	C1RL
201430_s_at	1.84e-05	0.892871	DPYSL3
200045_at	5.73e-10	0.892649	ABCF1
202342_s_at	0.000609	0.892515	TRIM2
209911_x_at	0.000806	0.892318	HIST1H2BD
216682_s_at	5.66e-07	0.892244	SUPT20H
205569_at	0.00134	0.892019	LAMP3
204190_at	4.77e-11	0.891973	USPL1
221226_s_at	3.74e-11	0.891935	ASIC4
214850_at	2.75e-06	0.891919	SMA4
202328_s_at	8.4e-11	0.891854	LOC101930075///PKD1
221428_s_at	0.000449	0.891643	TBL1XR1
211339_s_at	2.15e-08	0.891595	ITK
222111_at	3.53e-05	0.891519	FAM63B
203747_at	3.77e-08	0.891504	AQP3
219579_at	3.02e-07	0.891271	RAB3IL1
204480_s_at	0.000409	0.891046	C9orf16
221664_s_at	2.19e-05	0.890795	F11R
201975_at	2.71e-10	0.890715	CLIP1
221490_at	7.9e-16	0.890617	UBAP1
215533_s_at	2.5e-07	0.890579	UBE4B
207419_s_at	9e-07	0.890348	RAC2
38964_r_at	2.04e-12	0.89023	WAS
214234_s_at	0.00893	0.89023	CYP3A5
221822_at	7.54e-10	0.890143	SGF29
201777_s_at	3.44e-09	0.889827	EFCAB14
219952_s_at	1.31e-10	0.889772	MCOLN1
219454_at	0.00359	0.889751	EGFL6
213705_at	5.19e-06	0.889736	GGCX
220947_s_at	3.95e-12	0.889647	TBC1D10B
214656_x_at	1.22e-10	0.889608	MYO1C
209380_s_at	1.35e-06	0.889457	ABCC5
204191_at	1.93e-13	0.889267	IFNAR1
215181_at	7.9e-16	0.889181	CDH22
204344_s_at	5.62e-07	0.889181	SEC23A
212120_at	7.82e-07	0.889163	RHOQ
218252_at	0.00017	0.888945	CKAP2
208925_at	1.14e-06	0.888869	CLDND1
215545_at	5.17e-09	0.888858
215222_x_at	5.03e-09	0.888835	MACF1
214585_s_at	9.44e-16	0.88877	VPS52
205248_at	2.25e-05	0.88873	DOPEY2
213498_at	1.81e-11	0.888637	CREB3L1
208370_s_at	3.02e-08	0.88852	RCAN1
200706_s_at	1.99e-06	0.888517	LITAF
202425_x_at	2.09e-08	0.888221	PPP3CA
205447_s_at	2.93e-09	0.888157	MAP3K12
219678_x_at	3.58e-11	0.888086	DCLRE1C
204195_s_at	2.72e-13	0.887942	PKNOX1
217708_x_at	6.86e-10	0.887848
215990_s_at	1.59e-08	0.887737	BCL6
206455_s_at	1.12e-13	0.887664	RHO
213475_s_at	6.73e-12	0.88742	ITGAL
217499_x_at	5.93e-09	0.887415	OR7E37P
203339_at	4.24e-08	0.887407	SLC25A12
55081_at	3.59e-07	0.887239	MICALL1
205159_at	0.00207	0.887065	CSF2RB
206725_x_at	5.25e-09	0.886822	BMP1
221600_s_at	8.24e-08	0.886801	AAMDC
211142_x_at	1.5e-10	0.88677	HLA-DOA
201971_s_at	0.000328	0.886687	ATP6V1A
41386_i_at	2.76e-09	0.886634	KDM6B
218139_s_at	1.31e-06	0.886536	AP5M1
204692_at	3.4e-06	0.88652	SAP25///LRCH4
204091_at	6.43e-07	0.886498	PDE6D
219079_at	1.38e-06	0.886479	CYB5R4
206463_s_at	0.000613	0.886411	DHRS2
216470_x_at	0.00138	0.886401	PRSS2
221960_s_at	7.99e-05	0.8864	RAB2A
210647_x_at	5.76e-11	0.886175	PLA2G6
217339_x_at	0.000304	0.886149	CTAG1A///CTAG1B
219147_s_at	2.26e-05	0.886132	NMRK1
214252_s_at	1.17e-10	0.886106	CLN5
36994_at	1.11e-09	0.886066	ATP6V0C
220035_at	1.52e-05	0.886046	NUP210
217820_s_at	0.000264	0.885933	ENAH
216705_s_at	2.05e-07	0.885869	ADA
209933_s_at	1.19e-06	0.885853	CD300A
210276_s_at	1.93e-05	0.88585	NOL12///TRIOBP
204036_at	1.27e-05	0.885821	LPAR1
206569_at	0.0132	0.885461	IL24
221878_at	1.8e-10	0.885121	C2orf68
209865_at	0.00177	0.885082	SLC35A3
200766_at	1.72e-06	0.884965	CTSD
202074_s_at	2.23e-08	0.884777	OPTN
203234_at	1.76e-05	0.884741	UPP1
202195_s_at	1.67e-06	0.884722	TMED5
212112_s_at	3.51e-09	0.884656	STX12
202829_s_at	4.05e-07	0.884644	VAMP7
218857_s_at	8.45e-06	0.884524	ASRGL1
214338_at	6.65e-12	0.884446	DNAJB12
221783_at	2.75e-11	0.884423	WIZ
202510_s_at	0.000462	0.884344	TNFAIP2
201877_s_at	2.38e-08	0.884328	PPP2R5C
204792_s_at	3.06e-13	0.884108	IFT140
212531_at	0.0271	0.884108	LCN2
218525_s_at	1.84e-17	0.884046	HIF1AN
207971_s_at	1.32e-13	0.88402	CEP68
204978_at	5.96e-12	0.884015	CLASRP
214866_at	6.09e-06	0.883465	PLAUR
222158_s_at	5.04e-05	0.883185	DESI2
215565_at	2.77e-05	0.88316	LOC101929272
204604_at	7.42e-07	0.883159	CDK14
219689_at	6.83e-09	0.883081	SEMA3G
212393_at	7.65e-09	0.883064	SBF1
212448_at	5.75e-07	0.882993	NEDD4L
209297_at	5.3e-11	0.882972	ITSN1
210571_s_at	1.98e-07	0.882971	CMAHP
220291_at	1.49e-09	0.882967	GDPD2
209743_s_at	1.7e-07	0.882847	ITCH
206686_at	3.07e-11	0.88266	PDK1
203206_at	2.31e-14	0.882614	FAM53B
214890_s_at	8.79e-05	0.882604	FAM149A
40273_at	2.51e-13	0.882601	SPHK2
209647_s_at	3e-07	0.882472	SOCS5
32811_at	6.44e-11	0.882287	MYO1C
202140_s_at	2.85e-13	0.882238	CLK3
202422_s_at	8.6e-05	0.882235	ACSL4
218295_s_at	3.87e-06	0.882202	NUP50
209633_at	8.35e-09	0.882179	PPP2R3A
213853_at	6.49e-09	0.882134	DNAJC24
40016_g_at	3.16e-08	0.88208	MAST4
215806_x_at	1.91e-05	0.882026	TARP///TRGV9///TRGC2
208415_x_at	4.15e-16	0.881876	ING1
214132_at	1.94e-07	0.88184	ATP5C1
215294_s_at	0.000398	0.881823	SMARCA1
216892_at	7.49e-14	0.881782	IGHG1
218045_x_at	2.83e-06	0.881567	PTMS
213833_x_at	2.91e-18	0.881561	NOP16
210283_x_at	4.5e-06	0.881484	PAIP1
213659_at	1.52e-09	0.881113	ZNF75D
204343_at	2.86e-11	0.881058	ABCA3
220209_at	6.48e-06	0.881058	PYY2
210788_s_at	5.64e-07	0.881056	DHRS7
210132_at	9.86e-08	0.881052	EFNA3
219613_s_at	1.21e-13	0.881005	SIRT6
202329_at	3.24e-09	0.880943	CSK
215209_at	4.49e-07	0.880935	SEC24D
203837_at	1.12e-07	0.880819	MAP3K5
45288_at	1.36e-08	0.880779	ABHD6
205597_at	0.0053	0.880606	SLC44A4
203204_s_at	1.75e-12	0.880564	KDM4A
219543_at	0.00802	0.880549	PBLD
219675_s_at	7.29e-07	0.880436	UXS1
35254_at	1.36e-12	0.880423	TRAFD1
202067_s_at	1.07e-05	0.880419	LDLR
202958_at	9.09e-15	0.880414	PTPN9
220366_at	3.57e-19	0.880412	ELSPBP1
201041_s_at	4.41e-05	0.880375	DUSP1
215129_at	0.00252	0.880367	PIK3C2G
219046_s_at	1.61e-11	0.880357	PKNOX2
218018_at	8.78e-13	0.880306	PDXK
203764_at	0.000162	0.88025	DLGAP5
205813_s_at	7.63e-11	0.88019	MAT1A
213115_at	1.79e-08	0.880104	ATG4A
205354_at	8.08e-12	0.880012	GAMT
202967_at	1.43e-05	0.880008	GSTA4
201363_s_at	2.76e-07	0.879969	IVNS1ABP
221787_at	5.01e-08	0.879949	C6orf120
202636_at	2.86e-08	0.879897	RNF103
212507_at	1.05e-06	0.879663	TMEM131
210978_s_at	0.000102	0.879591	TAGLN2
201908_at	2.66e-05	0.879553	DVL3
221724_s_at	8.18e-07	0.879359	CLEC4A
222371_at	2.41e-06	0.879336
216730_at	5.7e-14	0.879308
215300_s_at	3.22e-05	0.879155	FMO5
204971_at	0.00747	0.879137	CSTA
204169_at	1.13e-10	0.878883	IMPDH1
219132_at	0.000111	0.878621	PELI2
205013_s_at	8.68e-10	0.878609	SPECC1L-ADORA2A///ADORA2A
211575_s_at	6.41e-09	0.878556	UBE3A
207595_s_at	3.07e-09	0.87846	BMP1
203383_s_at	2.38e-13	0.878379	GOLGA1
201866_s_at	2.27e-08	0.878374	NR3C1
206510_at	2.82e-07	0.878335	SIX2
201911_s_at	4.92e-06	0.878312	FARP1
210649_s_at	0.000267	0.878271	ARID1A
219938_s_at	0.00119	0.878179	PSTPIP2
218586_at	5.28e-06	0.878166	MRGBP
210775_x_at	1.11e-12	0.878105	CASP9
212221_x_at	4.14e-08	0.877967	IDS
212051_at	1.2e-06	0.877714	WIPF2
211809_x_at	7.15e-10	0.877638	COL13A1
211366_x_at	0.000147	0.877387	CASP1
219471_at	9.24e-05	0.877364	KIAA0226L
201460_at	6.03e-14	0.877135	MAPKAPK2
218841_at	1.95e-09	0.877079	ASB8
202752_x_at	5.56e-06	0.877046	SLC7A8
204365_s_at	9.81e-05	0.876976	REEP1
64438_at	1.08e-16	0.876972	OGFOD3
209629_s_at	1.81e-07	0.876926	NXT2
209061_at	3.15e-08	0.876901	NCOA3
204446_s_at	0.0034	0.876677	ALOX5
214993_at	1.86e-07	0.876642	ASPHD1
216338_s_at	6.7e-09	0.876406	YIPF3
209278_s_at	0.012	0.876311	TFPI2
203147_s_at	1.45e-05	0.876023	TRIM14
217828_at	8.66e-09	0.875938	SLTM
213307_at	1.54e-05	0.875898	SHANK2
35846_at	2.05e-10	0.875817	THRA
210925_at	6.69e-18	0.875792	CIITA
211546_x_at	1.4e-12	0.875699	SNCA
212780_at	2.57e-08	0.875619	SOS1
204685_s_at	8.86e-18	0.875556	ATP2B2
217211_at	4.26e-09	0.875485	ACTBP9
206796_at	1.36e-07	0.875469	WISP1
205567_at	3.55e-08	0.8754	CHST1
205568_at	0.0037	0.87499	AQP9
218835_at	2.7e-15	0.874897	SFTPA2///SFTPA1
214473_x_at	2.25e-09	0.874894	PMS2P3
201482_at	1.14e-05	0.874888	QSOX1
218416_s_at	2.39e-15	0.87487	SLC48A1
203212_s_at	2.21e-10	0.874868	MTMR2
213397_x_at	0.00272	0.87466	RNASE4
202959_at	7.5e-08	0.874611	MUT
209048_s_at	6.72e-07	0.874519	ZMYND8
221670_s_at	6.13e-13	0.87449	LHX3
212887_at	3.34e-05	0.874477	SEC23A
41047_at	3.39e-05	0.874387	C9orf16
209044_x_at	6.1e-08	0.874293	SF3B4
206132_at	1.41e-14	0.874244	MCC
212633_at	0.000304	0.87422	UFL1
205002_at	8.97e-12	0.874022	AHDC1
217817_at	1.36e-09	0.873931	ARPC4
210619_s_at	0.00108	0.873903	HYAL1
216401_x_at	0.00505	0.873792	MLIP
202149_at	0.000171	0.873707	NEDD9
211672_s_at	0.000375	0.873697	ARPC4-TTLL3///ARPC4
209141_at	1.18e-10	0.873693	UBE2G1
204433_s_at	2.17e-08	0.87366	SPATA2
221760_at	6.06e-05	0.873607	MAN1A1
213487_at	7.66e-14	0.873442	MAP2K2
57082_at	5.06e-11	0.873354	LDLRAP1
206714_at	1.1e-10	0.873253	ALOX15B
204698_at	0.000161	0.873239	ISG20
204248_at	2.71e-05	0.873168	GNA11
208009_s_at	8.12e-08	0.873107	ARHGEF16
207269_at	2.8e-15	0.872982	DEFA4
213958_at	3.62e-10	0.872918	CD6
220041_at	9.64e-07	0.872889	PIGZ
201668_x_at	9.14e-05	0.872884	MARCKS
221421_s_at	1.88e-15	0.872804	ADAMTS12
203409_at	4.94e-07	0.872791	DDB2
55065_at	1.22e-08	0.872772	MARK4
219379_x_at	1.28e-12	0.87272	ZNF358
222151_s_at	5e-10	0.872624	CEP63
209304_x_at	3.34e-07	0.872586	GADD45B
204235_s_at	0.00829	0.872506	GULP1
203730_s_at	1.56e-09	0.872484	ZKSCAN5
205843_x_at	2.2e-11	0.872247	CRAT
220246_at	2.72e-11	0.872222	CAMK1D
209514_s_at	0.000883	0.872201	RAB27A
216221_s_at	1.98e-11	0.872158	PUM2
213981_at	6.82e-12	0.872081	COMT
218393_s_at	1.41e-07	0.872017	SMU1
218693_at	6.76e-07	0.871892	TSPAN15
216047_x_at	1.13e-14	0.871842	SEZ6L
213861_s_at	1.95e-09	0.871695	METTL21B
213896_x_at	1.2e-11	0.871665	FAM149B1
216557_x_at	0.000865	0.871664	IGHV4-31///IGHM///IGHG3///IGHG1///IGHD///IGHA1
202957_at	0.000206	0.871634	HCLS1
218770_s_at	4.99e-11	0.871497	TMEM39B
221785_at	9.02e-09	0.871443	WIZ
211874_s_at	8.93e-12	0.871403	KAT6B
222302_at	1.84e-12	0.87133
201582_at	1.88e-05	0.871307	SEC23B
204002_s_at	5.53e-13	0.871245	ICA1
207782_s_at	1.25e-05	0.8712	PSEN1
207078_at	3.32e-06	0.871107	MED6
207708_at	8.56e-13	0.871011	ALOXE3
218326_s_at	8.11e-05	0.871005	LGR4
213274_s_at	9.87e-05	0.870997	CTSB
214354_x_at	1.62e-09	0.870862	SFTPB
203858_s_at	1.07e-14	0.870805	COX10
217297_s_at	9e-12	0.870792	MYO9B
203593_at	5.61e-08	0.870769	CD2AP
219297_at	1.6e-06	0.870748	WDR44
217497_at	5.35e-06	0.870326	TYMP
208998_at	4.66e-05	0.870319	UCP2
209428_s_at	8.73e-10	0.870309	ZFPL1
211561_x_at	5.87e-09	0.870273	MAPK14
213686_at	8.21e-08	0.870253	VPS13A
208284_x_at	2.57e-05	0.87013	GGT2///GGTLC1///GGTLC2///GGT1
211233_x_at	9.97e-16	0.87001	ESR1
212196_at	8.85e-06	0.869898	IL6ST
214169_at	7.33e-09	0.869893	SUN1
202909_at	4.15e-06	0.869732	EPM2AIP1
206624_at	1.11e-05	0.8697	USP9Y
216576_x_at	0.0141	0.869546	IGK///IGKC
218992_at	1.97e-05	0.869423	PLGRKT
201259_s_at	1.64e-05	0.869325	SYPL1
212906_at	2.62e-06	0.868966	GRAMD1B
209782_s_at	2.67e-14	0.868761	DBP
201439_at	8.09e-11	0.868692	GBF1
200730_s_at	0.0015	0.868656	PTP4A1
209306_s_at	7.05e-08	0.868616	SWAP70
213884_s_at	7.36e-22	0.868279	TRIM3
204562_at	7.07e-06	0.868132	IRF4
204961_s_at	2.63e-05	0.868112	NCF1C///NCF1B///NCF1
212993_at	3.96e-09	0.868	NACC2
221477_s_at	3.46e-05	0.867977	LOC100129518///SOD2
218287_s_at	2.12e-08	0.867797	AGO1
219450_at	0.000447	0.867741	C4orf19
208290_s_at	3.26e-07	0.867674	EIF5
220262_s_at	3.86e-11	0.867534	DLK2
203041_s_at	2.8e-06	0.867402	LAMP2
213682_at	1.26e-12	0.867397	NUP50
222304_x_at	2.7e-12	0.867318	OR7E47P
215083_at	5.92e-06	0.867279
208924_at	2.61e-07	0.867234	RNF11
214812_s_at	5.69e-14	0.866857	MOB1A
200855_at	4.63e-12	0.866673	NCOR1
212144_at	4.17e-12	0.866609	SUN2
215381_at	9.85e-13	0.866585	MTOR
211749_s_at	1.8e-08	0.866559	VAMP3
202221_s_at	1.55e-05	0.866462	EP300
210950_s_at	5.21e-06	0.866308	FDFT1
37278_at	2.41e-15	0.866261	TAZ
210544_s_at	1.25e-07	0.866232	ALDH3A2
64474_g_at	1.76e-13	0.866229	MIR1306///DGCR8
221779_at	1.65e-08	0.866172	MICALL1
222024_s_at	5.84e-05	0.865996	AKAP13
40829_at	6.19e-15	0.865921	WDTC1
213257_at	1.18e-10	0.865898	SARM1
200948_at	1.03e-07	0.865719	MLF2
213797_at	0.0131	0.865689	RSAD2
203254_s_at	3.15e-07	0.865685	TLN1
204304_s_at	0.0146	0.865564	PROM1
203909_at	2.47e-09	0.865563	SLC9A6
207485_x_at	6.33e-10	0.865517	BTN3A1
218487_at	4.72e-10	0.865381	ALAD
221696_s_at	6.35e-05	0.865357	STYK1
218972_at	2.73e-07	0.865319	TTC17
208792_s_at	0.00616	0.865286	CLU
208495_at	5.3e-12	0.865269	TLX3
221282_x_at	2.54e-17	0.86523	RUNX2
214506_at	2.16e-16	0.865183	GPR182
204150_at	7.18e-08	0.865177	STAB1
219487_at	2.97e-08	0.865082	BBS10
219880_at	4.69e-06	0.865061	CTC-338M12.4
216472_at	4.82e-07	0.865046
210118_s_at	0.00229	0.86501	IL1A
222143_s_at	1.49e-11	0.864983	MTMR14
202866_at	2.54e-11	0.864929	DNAJB12
220468_at	0.0346	0.864735	ARL14
203142_s_at	2.03e-12	0.864598	AP3B1
209965_s_at	1.03e-15	0.864526	RAD51D
214708_at	1.4e-08	0.864525	SNTB1
202666_s_at	1.42e-05	0.864195	ACTL6A
221944_at	5.64e-11	0.864119	FLJ42627
214838_at	1.54e-12	0.864047	SFT2D2
206997_s_at	1.88e-11	0.864029	HS6ST1
219686_at	3.21e-10	0.864007	STK32B
221493_at	3.73e-09	0.863975	TSPYL1
37005_at	3.55e-06	0.863939	MINOS1-NBL1///NBL1
40020_at	2.22e-07	0.863907	CELSR3
215836_s_at	5.15e-09	0.863867	PCDHGA1///PCDHGA2///PCDHGA3///PCDHGA4///PCDHGA5///PCDHGA6///PCDHGA7///PCDHGA9///PCDHGA10///PCDHGA11///PCDHGB1///PCDHGB2///PCDHGB3///PCDHGB5///PCDHGB6///PCDHGB7///PCDHGC4///PCDHGC5///PCDHGA12///PCDHGA8///PCDHGB4///PCDHGC3
212652_s_at	1.14e-08	0.863683	SNX4
209410_s_at	1.62e-07	0.863671	GRB10
203394_s_at	0.00158	0.863668	HES1
207045_at	1.4e-22	0.863666	VPS50
212471_at	4.66e-12	0.863204	AVL9
203932_at	0.000527	0.863157	HLA-DMB
207304_at	4.52e-11	0.863056	ZNF45
210933_s_at	6.46e-05	0.863022	FSCN1
202849_x_at	5.25e-14	0.862974	GRK6
217173_s_at	2.21e-07	0.862968	LDLR
204378_at	0.0132	0.862961	BCAS1
218945_at	6.7e-11	0.86289	METTL22
212167_s_at	3.69e-12	0.86286	SMARCB1
202114_at	6.45e-12	0.862788	SNX2
208052_x_at	6.98e-12	0.862767	CEACAM3
200785_s_at	4.48e-09	0.862742	LRP1
206910_x_at	1e-18	0.862686	CFHR2
204279_at	0.000358	0.862674	PSMB9
44822_s_at	7.66e-15	0.862596	MIER2
200970_s_at	1.57e-06	0.862587	SERP1
216381_x_at	0.00278	0.862496	AKR7A3
203581_at	7.33e-08	0.862382	SPHAR///RAB4A
203952_at	1.8e-17	0.862332	ATF6
218177_at	3.06e-11	0.862223	CHMP1B
220763_at	2.92e-18	0.862221	HSPA12A
213018_at	1.37e-06	0.862106	GATAD1
210154_at	4.45e-05	0.862082	ME2
219070_s_at	8.22e-11	0.862051	MOSPD3
208917_x_at	1.85e-09	0.86198	NADK
32091_at	1.03e-10	0.861973	SLC25A44
215314_at	1.41e-07	0.861748
214933_at	5.22e-07	0.86165	LOC100507353///CACNA1A
204858_s_at	0.000307	0.861594	TYMP
214020_x_at	1.45e-16	0.86159	ITGB5
1316_at	1.44e-14	0.861589	THRA
215191_at	4.37e-05	0.861431
205437_at	9.24e-07	0.861326	ZNF211
208503_s_at	1.86e-05	0.861186	GATAD1
207389_at	8.12e-13	0.861107	GP1BA
206482_at	0.00061	0.860957	PTK6
64486_at	8.45e-08	0.860945	CORO1B
206707_x_at	1.53e-07	0.860944	FAM65B
202245_at	5.23e-10	0.860905	LSS
217671_at	8e-07	0.860722	DSERG1
213085_s_at	1.94e-08	0.860286	WWC1
209677_at	3.72e-08	0.860219	PRKCI
201146_at	1.27e-10	0.860182	NFE2L2
218195_at	3.29e-05	0.860055	ARMT1
213246_at	9.3e-07	0.860025	TMEM251
219177_at	7.44e-08	0.860003	BRIX1
210064_s_at	0.0076	0.860002	UPK1B
211778_s_at	1.77e-05	0.859853	OVOL2
219407_s_at	1.33e-08	0.859784	LAMC3
51192_at	9.84e-12	0.859714	SSH3
45572_s_at	1.22e-11	0.859699	GGA1
212272_at	1.95e-09	0.859637	LPIN1
213349_at	5.29e-08	0.859489	TMCC1
204106_at	7.54e-11	0.859391	TESK1
214763_at	5.33e-08	0.859364	ACOT11
39582_at	1.86e-10	0.859295	CYLD
207667_s_at	4.32e-10	0.859224	LOC100996792///MAP2K3
203424_s_at	0.000151	0.859171	IGFBP5
209142_s_at	5.1e-06	0.859037	UBE2G1
219127_at	0.000468	0.858978	PRR15L
204231_s_at	1.93e-09	0.858962	FAAH
210639_s_at	2.26e-05	0.858904	ATG5
201785_at	0.00737	0.858841	RNASE1
210864_x_at	1.94e-11	0.858839	HFE
204166_at	1.1e-07	0.858579	SBNO2
218748_s_at	3.43e-05	0.85854	EXOC5
212093_s_at	0.000915	0.858506	MTUS1
221064_s_at	3.45e-12	0.858499	UNKL
218086_at	5.52e-05	0.858442	NPDC1
220484_at	1.54e-07	0.858439	MCOLN3
217986_s_at	7.52e-06	0.858424	BAZ1A
202710_at	5.62e-09	0.858344	BET1
219023_at	3.31e-07	0.85834	AP1AR
205301_s_at	1.24e-14	0.858321	OGG1
201237_at	0.000337	0.858302	CAPZA2
203395_s_at	4.12e-09	0.858128	HES1
215855_s_at	4.64e-10	0.858015	TMF1
219545_at	0.000516	0.858	NDUFC2-KCTD14///KCTD14
211800_s_at	2.05e-11	0.857746	USP4
209106_at	1.12e-07	0.857609	NCOA1
207201_s_at	6.61e-12	0.857551	SLC22A1
221599_at	5.67e-07	0.857541	AAMDC
220734_s_at	2.51e-08	0.857527	CPTP
214749_s_at	1.46e-06	0.857468	ARMCX6
203970_s_at	2.26e-06	0.857366	PEX3
208122_x_at	2.01e-12	0.857313	KIR2DS3
212699_at	2.8e-05	0.857295	SCAMP5
213193_x_at	0.00015	0.857286	TRBC1
218222_x_at	4.68e-17	0.857276	ARNT
203810_at	2.4e-07	0.857248	DNAJB4
221985_at	3.36e-06	0.857205	KLHL24
201383_s_at	1.77e-07	0.857177	NBR1
205078_at	4.35e-06	0.85716	PIGF
204476_s_at	1.64e-07	0.857106	PC
36019_at	2.72e-13	0.857066	STK19
201410_at	5.95e-10	0.85706	PLEKHB2
200815_s_at	6.85e-09	0.856948	PAFAH1B1
203230_at	1.95e-09	0.85666	DVL1
212508_at	2.43e-07	0.856538	MOAP1
214599_at	7.81e-09	0.856524	IVL
217924_at	9.64e-11	0.856403	C6orf106
209422_at	7.56e-06	0.856305	PHF20
214990_at	1.37e-09	0.856297	PIGO
221965_at	3.1e-08	0.856282
221695_s_at	9.05e-07	0.856199	MAP3K2
218928_s_at	8.85e-06	0.85606	SLC37A1
201980_s_at	9.6e-09	0.856038	RSU1
215464_s_at	3.25e-06	0.855973	P2RX5-TAX1BP3///TAX1BP3///P2RX5
201256_at	5.52e-15	0.855925	COX7A2L
212759_s_at	1.04e-07	0.855901	TCF7L2
220760_x_at	6.38e-09	0.855882	ZNF665
204178_s_at	1.33e-12	0.855857	RBM14
200854_at	2.22e-09	0.85583	NCOR1
212671_s_at	0.0398	0.855827	LOC100509457///HLA-DQA2///HLA-DQA1
201140_s_at	2.71e-07	0.855664	RAB5C
211962_s_at	4.57e-08	0.85563	ZFP36L1
214149_s_at	0.003	0.855611	ATP6V0E1
201125_s_at	1.2e-09	0.855575	ITGB5
212262_at	5.37e-05	0.855555	QKI
205671_s_at	6.2e-07	0.855451	HLA-DOB
211387_x_at	2.85e-09	0.855432	RNGTT
212777_at	3.49e-10	0.85541	SOS1
204418_x_at	6.85e-06	0.855375	GSTM2
222316_at	0.000174	0.855371
217336_at	1.8e-09	0.855336
202115_s_at	6.31e-08	0.855217	NOC2L
203660_s_at	3.62e-11	0.855161	PCNT
219708_at	2.68e-13	0.855024	NT5M
211547_s_at	2.06e-08	0.854953	PAFAH1B1
216389_s_at	1.63e-10	0.854923	DCAF11
201942_s_at	0.000218	0.85485	CPD
210024_s_at	4.52e-09	0.854722	UBE2E3
218666_s_at	1.78e-11	0.854683	STX17
210719_s_at	7.2e-07	0.854521	HMG20B
204675_at	0.000211	0.854403	SRD5A1
201598_s_at	6.22e-11	0.854398	INPPL1
210269_s_at	2.14e-08	0.854344	AKAP17A
219206_x_at	5.33e-11	0.854343	TMBIM4
219090_at	3.13e-05	0.854316	SLC24A3
210706_s_at	7.35e-07	0.854257	RNF24
201102_s_at	7.33e-09	0.854173	PFKL
208351_s_at	1.75e-09	0.854151	MAPK1
203758_at	7.64e-05	0.854068	CTSO
201712_s_at	9.34e-11	0.854067	RANBP2
208960_s_at	3.3e-05	0.854065	KLF6
204674_at	1.87e-06	0.854014	LRMP
200623_s_at	5.54e-07	0.853893	CALM3///CALM2///CALM1
212474_at	8.08e-08	0.853876	AVL9
207431_s_at	3.69e-05	0.853758	DEGS1
201346_at	3.59e-08	0.853679	ADIPOR2
204663_at	2.27e-08	0.853645	ME3
55872_at	0.000358	0.853637	ZNF512B
38487_at	9.96e-08	0.853583	STAB1
221469_at	1.71e-11	0.853561	GPR32
205207_at	0.0315	0.853431	IL6
220999_s_at	3.07e-07	0.853375	CYFIP2
222251_s_at	5.98e-11	0.853343	GMEB2
200816_s_at	2.82e-09	0.853177	PAFAH1B1
220964_s_at	1.4e-12	0.853123	RAB1B
217735_s_at	5.65e-08	0.853073	EIF2AK1
218470_at	2.05e-11	0.852943	YARS2
221588_x_at	2.74e-05	0.852927	ALDH6A1
218608_at	2.85e-07	0.852894	ATP13A2
204461_x_at	6.75e-08	0.852891	RAD1
213244_at	2.26e-07	0.85288	SCAMP4
201627_s_at	3.11e-07	0.852852	INSIG1
203146_s_at	3.75e-05	0.852764	GABBR1
217864_s_at	1.5e-08	0.852335	PIAS1
209257_s_at	0.00101	0.852209	SMC3
202224_at	1.03e-06	0.852175	CRK
204658_at	2.27e-07	0.852108	TRA2A
204642_at	9.83e-09	0.8521	S1PR1
206487_at	4.64e-07	0.851997	SUN1
213412_at	1.78e-05	0.851977	TJP3
202162_s_at	4.34e-09	0.85196	CNOT8
202151_s_at	5.06e-11	0.851878	UBAC1
202808_at	1.9e-09	0.851798	WBP1L
218878_s_at	3.07e-06	0.851638	SIRT1
218665_at	2.09e-08	0.851611	FZD4
211671_s_at	3.41e-05	0.851424	NR3C1
204351_at	0.00039	0.85131	S100P
212021_s_at	3.86e-06	0.851203	MKI67
204444_at	2.42e-05	0.851176	KIF11
210629_x_at	1.13e-06	0.851167	LST1
217678_at	0.00195	0.850946	SLC7A11
205600_x_at	2.1e-09	0.850921	HOXB5
206273_at	7.79e-11	0.850835	PRELID3A
212001_at	5.79e-10	0.850696	SUGP2
205574_x_at	3.64e-07	0.850669	BMP1
209064_x_at	6.57e-06	0.850612	PAIP1
42361_g_at	5.51e-12	0.850605	CCHCR1
213847_at	2.2e-11	0.850589	PRPH
219538_at	5.08e-09	0.850577	WDR5B
213546_at	2.47e-08	0.85057	DKFZP586I1420
209280_at	8.36e-09	0.850533	MRC2
214387_x_at	8.9e-14	0.850528	SFTPC
205637_s_at	2.81e-07	0.85033	SH3GL3
201984_s_at	7.46e-05	0.850187	EGFR
209229_s_at	6.1e-10	0.850159	PPP6R1
215553_x_at	2.45e-10	0.850153
202947_s_at	5.13e-09	0.850138	GYPC
203312_x_at	3.15e-11	0.850117	ARF6
216603_at	1.15e-06	0.84995	SLC7A8
205970_at	4.57e-14	0.849949	MT3
203520_s_at	7.02e-09	0.849797	ZNF318
218289_s_at	4.34e-08	0.849787	UBA5
218170_at	3.57e-05	0.849762	ISOC1
216284_at	6.05e-10	0.849732
219610_at	4.11e-09	0.84967	ARHGEF28
205091_x_at	1.58e-05	0.84956	RECQL
202356_s_at	1.69e-12	0.849515	GTF2F1
201886_at	1.82e-09	0.849456	DCAF11
220134_x_at	1.53e-08	0.849455	EVA1B
218540_at	9.94e-12	0.849401	THTPA
213279_at	2.81e-08	0.849401	DHRS1
48612_at	5.26e-11	0.849367	N4BP1
222183_x_at	6.37e-08	0.849338	MBD3
201531_at	4.26e-08	0.849331	ZFP36
222263_at	1.47e-07	0.849275	SLC35E1
202331_at	4.91e-12	0.849098	BCKDHA
221762_s_at	2.8e-10	0.849079	PCIF1
206308_at	3.38e-11	0.849063	TRDMT1
209487_at	5.35e-05	0.849027	RBPMS
212043_at	1.44e-07	0.849013	TGOLN2
211316_x_at	5.45e-07	0.848986	CFLAR
222379_at	1.16e-09	0.848908	KCNE4
208078_s_at	0.000191	0.848868	SIK1
204173_at	1.54e-05	0.84886	MYL6B
221025_x_at	7.89e-13	0.848786	PUS7L
205027_s_at	5.35e-06	0.848717	MAP3K8
218906_x_at	1.44e-12	0.848704	KLC2
205214_at	8.89e-10	0.848654	STK17B
32099_at	1.31e-11	0.848628	SAFB2
208557_at	6.9e-12	0.848568	HOXA6
203789_s_at	0.00955	0.848519	SEMA3C
217202_s_at	0.00135	0.848517	GLUL
208373_s_at	8.54e-08	0.848501	P2RY6
221736_at	6.9e-09	0.848271	RALGAPB
205253_at	5.73e-14	0.848207	PBX1
202886_s_at	2.61e-06	0.848105	PPP2R1B
202850_at	1.86e-06	0.84798	ABCD3
209003_at	6.89e-08	0.847894	SLC25A11
215906_at	3.66e-12	0.847831	Igk
202547_s_at	1.28e-06	0.847759	ARHGEF7
201507_at	1.14e-12	0.84769	PFDN1
215012_at	6.47e-07	0.847685	ZNF451
65884_at	4e-10	0.847519	MAN1B1
220358_at	9.94e-10	0.847483	BATF3
212340_at	6.19e-10	0.847407	YIPF6
220234_at	1.13e-05	0.847309	CA8
203030_s_at	1.1e-05	0.847304	PTPRN2
207790_at	3.83e-07	0.847287	LRRC1
203249_at	2.12e-10	0.847277	EZH1
203294_s_at	5.5e-08	0.847206	LMAN1
209919_x_at	4.61e-05	0.847119	GGT2///GGTLC1///GGTLC2///GGT1
205534_at	0.014	0.846953	PCDH7
212226_s_at	0.000588	0.846941	PLPP3
207249_s_at	0.0476	0.846824	SLC28A2
211554_s_at	1.43e-13	0.846659	APAF1
37145_at	3.62e-05	0.846634	GNLY
205548_s_at	3.02e-05	0.846483	BTG3
203879_at	7.54e-07	0.846452	PIK3CD
206064_s_at	3.34e-13	0.846424	PPIL2
213074_at	3.77e-08	0.846375	PHIP
217080_s_at	6.93e-06	0.846293	HOMER2
205427_at	1.9e-08	0.84627	ZNF354A
45633_at	2.83e-09	0.846255	GINS3
206174_s_at	5.49e-09	0.846251	PPP6C
210319_x_at	0.00233	0.846224	MSX2
201968_s_at	2.49e-06	0.846214	PGM1
203933_at	2.42e-11	0.846171	RAB11FIP3
AFFX-r2-Ec-bioC-5_at	0.01	0.846137
203987_at	0.000328	0.845997	FZD6
201502_s_at	1.96e-05	0.845987	NFKBIA
218208_at	8.62e-11	0.845973	PQLC1
218439_s_at	1.36e-06	0.84593	COMMD10
221817_at	1.51e-11	0.845907	DOLPP1
209424_s_at	0.00071	0.845708	C1QTNF3-AMACR///AMACR
204332_s_at	3.68e-06	0.845672	AGA
213784_at	1.68e-12	0.845642	IFT27
212101_at	1.38e-07	0.845592	KPNA6
203894_at	5.04e-13	0.845581	TUBG2
209695_at	4.34e-05	0.845548	PTP4A3
209760_at	1.35e-09	0.845513	KIAA0922
204848_x_at	0.00108	0.845468	HBG2///HBG1
212814_at	0.000108	0.845464	AHCYL2
201337_s_at	0.000118	0.845324	VAMP3
205318_at	1.26e-14	0.845315	KIF5A
217005_at	2.89e-15	0.845254	LDLR
221036_s_at	1.02e-09	0.845208	APH1B
204838_s_at	1.28e-09	0.845208	MLH3
208126_s_at	0.0251	0.845188	CYP2C18
222067_x_at	5.43e-06	0.845141	HIST1H2BD
219665_at	9.93e-12	0.845122	NUDT18
219103_at	5.97e-11	0.845119	ASAP3
214697_s_at	2.09e-05	0.845116	PTBP3
218687_s_at	0.00182	0.844971	MUC13
203514_at	1.43e-09	0.844867	MAP3K3
215775_at	3.49e-15	0.844857	THBS1
221922_at	8.74e-06	0.844827	GPSM2
213725_x_at	4.31e-05	0.844622	XYLT1
217944_at	4.95e-09	0.844513	POMGNT1
213060_s_at	8.3e-06	0.844473	CHI3L2
37424_at	1.22e-17	0.84441	CCHCR1
200825_s_at	4.26e-09	0.844406	HYOU1
218450_at	7.53e-06	0.844201	HEBP1
208255_s_at	3.53e-07	0.844141	FKBP8
217703_x_at	5.26e-11	0.844086
209682_at	4.63e-05	0.84408	CBLB
222369_at	2.59e-07	0.844049	NAA40
206838_at	1.96e-16	0.844005	TBX19
202377_at	1.89e-07	0.843743	LEPROT
200939_s_at	2.95e-21	0.843645	RERE
209667_at	0.00234	0.843534	CES2
202724_s_at	1.82e-06	0.84353	FOXO1
212503_s_at	7.1e-05	0.843467	DIP2C
205981_s_at	4.31e-08	0.843462	ING2
216387_x_at	3.34e-15	0.843441
209244_s_at	3.78e-08	0.84343	KIF1C
202811_at	2.74e-10	0.843427	STAMBP
203765_at	1.46e-05	0.843322	GCA
219617_at	2.24e-12	0.843295	CAMKMT
211703_s_at	1.3e-06	0.843246	TM2D1
210010_s_at	1.37e-06	0.843227	SLC25A1
214670_at	0.000326	0.843198	ZKSCAN1
210679_x_at	1.55e-06	0.843142
214713_at	1.31e-13	0.84313	YLPM1
214983_at	2.99e-10	0.842651	TTTY15
208824_x_at	4.51e-07	0.842607	CDK16
212148_at	0.00129	0.842607	PBX1
204447_at	1.37e-05	0.842531	LZTS3
218802_at	1.75e-07	0.842465	MCUB
222138_s_at	2.55e-09	0.842418	WDR13
209083_at	0.00013	0.842247	CORO1A
201500_s_at	4.89e-11	0.842233	PPP1R11
207396_s_at	1.99e-08	0.842035	ALG3
216292_at	4.61e-12	0.841999
214676_x_at	1.54e-05	0.841444	MUC3B
207096_at	3.39e-06	0.841426	SAA2-SAA4///SAA4
209182_s_at	6.49e-09	0.841287	C10orf10
215341_at	8.15e-15	0.841253	DNAH6
210020_x_at	0.00193	0.841131	CALML3
219216_at	2.32e-12	0.841019	ETAA1
217692_at	7.17e-16	0.840988	MAGOH2P
219017_at	0.000918	0.840938	ETNK1
37152_at	6.14e-08	0.840758	PPARD
203490_at	3.65e-12	0.840754	ELF4
216551_x_at	2.02e-12	0.840707	PLCG1
202658_at	3.06e-08	0.840703	PEX11B
210087_s_at	3.73e-05	0.840665	MPZL1
204072_s_at	0.00165	0.840563	FRY
218736_s_at	1.12e-06	0.840544	PALMD
216238_s_at	0.000157	0.840522	FGB
209939_x_at	8.42e-08	0.840451	CFLAR
212569_at	3.87e-07	0.840373	SMCHD1
218097_s_at	3.04e-09	0.840316	CUEDC2
221973_at	0.000429	0.840296	LOC100506123///LOC100506076
215631_s_at	1.76e-09	0.840243	BRMS1
204805_s_at	1.16e-06	0.84024	H1FX
203822_s_at	3.3e-08	0.840115	ELF2
213510_x_at	0.000191	0.840109	USP32P2
214635_at	4.83e-10	0.840099	CLDN9
212811_x_at	6.52e-06	0.840047	SLC1A4
205331_s_at	7.51e-09	0.839978	REEP2
207113_s_at	5.27e-08	0.839936	TNF
64064_at	2.08e-09	0.839931	GIMAP1-GIMAP5///GIMAP5
219716_at	3.53e-06	0.839848	APOL6
209496_at	0.00018	0.839789	RARRES2
221519_at	1.59e-12	0.839745	FBXW4
218367_x_at	4.69e-09	0.839718	USP21
216349_at	2.58e-17	0.839692	DGKH
218377_s_at	2.75e-09	0.839642	RWDD2B
211074_at	0.00856	0.839585	FOLR1
214665_s_at	1.58e-09	0.83955	CHP1
218012_at	8.63e-10	0.839516	TSPYL2
221602_s_at	5.48e-11	0.839514	FCMR
204089_x_at	2.56e-08	0.839489	MAP3K4
218378_s_at	1.29e-10	0.839468	LOC100630923///LOC100289561///PRKRIP1
220858_at	2.56e-08	0.839347	SORBS2
215024_at	7.66e-07	0.839275	CCZ1B
213711_at	2.76e-06	0.839196	KRT81
205590_at	0.000129	0.838962	RASGRP1
220297_at	1.76e-16	0.838867	BTBD7
32032_at	8.62e-15	0.838772	TSSK2///DGCR14
215411_s_at	3.35e-10	0.838717	TRAF3IP2
210136_at	0.0013	0.838637	MBP
201238_s_at	5.96e-07	0.838634	CAPZA2
203988_s_at	2.44e-05	0.838566	FUT8
201808_s_at	1.26e-09	0.838562	ENG
204124_at	7.02e-07	0.83849	SLC34A2
213830_at	3.56e-11	0.838485	YME1L1
211031_s_at	9.95e-08	0.838485	CLIP2
34210_at	0.000593	0.838457	CD52
220920_at	5.53e-06	0.8384	ATP10B
218780_at	6.74e-09	0.838366	HOOK2
212041_at	8.41e-08	0.838328	ATP6V0D1
203460_s_at	1.58e-05	0.838325	PSEN1
210739_x_at	8.92e-07	0.838244	SLC4A4
202295_s_at	2.66e-05	0.838166	CTSH
200862_at	8.35e-06	0.838111	DHCR24
205189_s_at	9.59e-13	0.838107	FANCC
221034_s_at	2.46e-17	0.838074	TEX13B
91703_at	1.14e-06	0.83802	EHBP1L1
221611_s_at	3.38e-15	0.837984	PHF7
[truncated: 20,278 more rows]

## Sheet: DEGs
	adj P-valu	FC	Genes
214612_x_at	0.00373	2.0276	MAGEA6
214603_at	2.44e-05	2.00733	MAGEA2B///MAGEA2
205319_at	0.000426	1.90072	PSCA
213265_at	0.00961	1.83265	PGA4///PGA3///PGA5
219398_at	9.38e-13	1.76317	CIDEC
206700_s_at	1.43e-06	1.75558	KDM5D
210467_x_at	0.00604	1.73283	MAGEA12
205000_at	5.98e-05	1.72342	DDX3Y
207912_s_at	0.00536	1.68817	DAZ4///DAZ2///DAZ3///DAZ1
210546_x_at	3.58e-05	1.65583	CTAG1A///CTAG1B
201909_at	0.002	1.60421	RPS4Y1
214254_at	0.000522	1.56382	MAGEA4
221122_at	0.000141	1.5589	HRASLS2
214642_x_at	6.43e-05	1.55863	MAGEA10-MAGEA5///MAGEA5
207909_x_at	0.0053	1.55321	DAZ4///DAZ2///DAZ3///DAZ1
215733_x_at	1.27e-05	1.54325	CTAG2
205623_at	4.73e-05	1.53825	ALDH3A1
209942_x_at	0.0296	1.52642	MAGEA6///MAGEA3
204410_at	1.1e-11	1.49265	EIF1AY
213456_at	0.000457	1.47977	SOSTDC1
208282_x_at	0.00922	1.47655	DAZ4///DAZ2///DAZ3///DAZ1
214183_s_at	2.27e-05	1.46437	TKTL1
212999_x_at	2.27e-06	1.461	LOC101060835///HLA-DQB1
204409_s_at	3.35e-05	1.44063	EIF1AY
201883_s_at	4.93e-12	1.42734	B4GALT1
210119_at	1.3e-05	1.41829	KCNJ15
209757_s_at	2.34e-07	1.40173	MYCN
211674_x_at	0.000953	1.39484	CTAG1A///CTAG1B
205979_at	0.00168	1.38936	SCGB2A1
207605_x_at	7.7e-07	1.38195	ZNF117
217235_x_at	1e-05	1.3796	IGLL5
217148_x_at	0.000215	1.37618	IGLJ3///IGLV@///IGLC1
213695_at	1.24e-05	1.37101	PON3
209374_s_at	0.00283	1.37028	IGHM
205650_s_at	2.67e-06	1.36448	FGA
203243_s_at	2.6e-08	1.35889	PDLIM5
207546_at	0.00606	1.35661	ATP4B
208281_x_at	0.00511	1.35218	DAZ4///DAZ2///DAZ3///DAZ1
210437_at	7.4e-05	1.35135	MAGEA9B///MAGEA9
207033_at	0.0273	1.34599	GIF
212807_s_at	1.89e-14	1.34196	SORT1
221491_x_at	1.17e-06	1.33823	LOC101060835///LOC100996809///HLA-DRB6///HLA-DRB5///HLA-DRB4///HLA-DRB3///HLA-DRB1///HLA-DQB1
210397_at	8.7e-05	1.33745	DEFB1
213831_at	0.00692	1.33533	LOC100509457///HLA-DQA1
205067_at	0.000223	1.33401	IL1B
209995_s_at	1.52e-17	1.32169	TCL1A
216419_at	3.04e-09	1.32145	CROCC
205259_at	2.03e-07	1.32125	NR3C2
203913_s_at	0.00402	1.31476	HPGD
216984_x_at	1.85e-05	1.30228	IGLJ3///IGLV1-44///CKAP2///IGLV@///IGLC1
214079_at	0.00148	1.29264	DHRS2
211645_x_at	0.000837	1.29131
215214_at	0.000169	1.28921	IGLC1
203535_at	0.00076	1.28526	S100A9
210735_s_at	2.22e-09	1.28477	CA12
219752_at	7.31e-12	1.28126	RASAL1
211549_s_at	0.000209	1.28035	HPGD
214777_at	0.000728	1.27851	IGKC
214091_s_at	1.58e-06	1.27725	GPX3
205910_s_at	1.27e-07	1.27455	CEL
219566_at	2.48e-07	1.2711	PLEKHF1
205199_at	0.000327	1.26751	CA9
222294_s_at	8.44e-07	1.26385	RAB27A
203963_at	7.78e-05	1.26053	CA12
203632_s_at	8.36e-05	1.25359	GPRC5B
211643_x_at	0.000166	1.25089	IGK///IGKC
217362_x_at	8.18e-08	1.25002	HLA-DRB6
203874_s_at	6.13e-05	1.24994	SMARCA1
217546_at	0.00166	1.24919	MT1M
205343_at	0.00722	1.24828	SULT1C2
216853_x_at	2.69e-05	1.24657	IGLJ3
211695_x_at	1.33e-06	1.2428	MUC1
217550_at	7.13e-10	1.24024	ATF6
210157_at	7.15e-08	1.23778	URI1
205464_at	9.87e-12	1.23724	SCNN1B
217014_s_at	7.73e-07	1.23678	AZGP1P1///AZGP1
220609_at	1.59e-07	1.23146	LOC202181
214792_x_at	1.1e-17	1.23007	VAMP2
202903_at	3.31e-12	1.22858	LSM5
214916_x_at	0.000142	1.22621	IGHV3-23///IGHV4-31///IGHM///IGHG3///IGHG1///IGHA2///IGHA1
214476_at	0.00816	1.22522	TFF2
205554_s_at	1.47e-07	1.22467	DNASE1L3
216236_s_at	0.00015	1.2243	SLC2A14///SLC2A3
220266_s_at	2.07e-05	1.22393	KLF4
220357_s_at	7.57e-11	1.22085	SGK2
214973_x_at	0.000351	1.2201	IGHD
217626_at	7.66e-07	1.21821	AKR1C1
221286_s_at	2.19e-05	1.21602	MZB1
203739_at	2.84e-05	1.21551	ZNF217
219326_s_at	1.65e-09	1.21487	B3GNT2
220622_at	3.63e-06	1.21442	LRRC31
39402_at	0.000275	1.2116	IL1B
210915_x_at	4.18e-06	1.21124	TRBC1
207522_s_at	1.97e-05	1.21119	ATP2A3
219281_at	5.99e-13	1.21056	MSRA
204161_s_at	3.98e-12	1.21041	ENPP4
200696_s_at	8.18e-08	1.21041	GSN
214421_x_at	0.000418	1.20917	CYP2C9
219562_at	8.76e-11	1.20687	RAB26
219223_at	2.01e-12	1.20652	CACFD1
218546_at	3.6e-06	1.20322	C1orf115
214768_x_at	0.00294	1.20228	IGKC
214756_x_at	4.47e-19	1.19916	PMS2P1
219695_at	2.94e-09	1.19733	SMPD3
207535_s_at	1.09e-14	1.19699	NFKB2
219250_s_at	0.000125	1.19674	FLRT3
214235_at	0.00119	1.19612	CYP3A5
206561_s_at	0.0209	1.19381	AKR1B10
219321_at	1.4e-11	1.19336	MPP5
215483_at	3.77e-08	1.19181	AKAP9
219429_at	3.21e-05	1.19153	FA2H
221156_x_at	1.84e-12	1.19097	CCPG1
212496_s_at	2.74e-14	1.19021	KDM4B
207065_at	1.55e-21	1.19	KRT75
218010_x_at	2.07e-10	1.18978	PPDPF
205270_s_at	2.79e-06	1.18882	LCP2
217117_x_at	4.64e-09	1.18838	MUC3B///MUC3A
207601_at	4.3e-06	1.188	SULT1B1
216782_at	1.83e-06	1.18542
201864_at	1.21e-15	1.18522	GDI1
205160_at	9.04e-12	1.18133	PEX11A
64440_at	1.85e-20	1.18119	IL17RC
208109_s_at	1.29e-08	1.18015	LINC00597
222272_x_at	8.39e-28	1.17828	SCIN
202581_at	1.52e-06	1.17791	HSPA1B///HSPA1A
205342_s_at	0.0124	1.17786	SULT1C2
214830_at	1.43e-09	1.1769	SLC38A6
219735_s_at	1.47e-09	1.17597	TFCP2L1
209606_at	2.36e-05	1.17528	CYTIP
222233_s_at	5.3e-08	1.17499	DCLRE1C
202311_s_at	0.000553	1.17311	COL1A1
222159_at	1.11e-11	1.16863
210185_at	5.16e-17	1.16845	CACNB1
206208_at	9.88e-08	1.16796	CA4
51158_at	2.03e-13	1.16705	FAM174B
201348_at	0.000133	1.16655	GPX3
205403_at	0.00349	1.16615	IL1R2
200648_s_at	3.03e-05	1.16582	GLUL
203471_s_at	9.67e-05	1.16576	PLEK
220030_at	0.00013	1.16505	STYK1
205691_at	3.66e-07	1.16377	SYNGR3
212285_s_at	3.79e-09	1.16366	AGRN
219630_at	0.00342	1.16156	PDZK1IP1
201534_s_at	1.68e-09	1.16119	UBL3
214465_at	0.0002	1.16033	ORM2///ORM1
212657_s_at	0.000714	1.15879	IL1RN
215176_x_at	0.00172	1.15847	IGK///IGKC
221943_x_at	5.1e-06	1.1584	RPL38
217378_x_at	0.00031	1.15737	IGKV1OR2-108
207139_at	0.000513	1.15699	ATP4A
203875_at	2.21e-06	1.15626	SMARCA1
220463_at	1.04e-23	1.15596	TRPM3
212768_s_at	0.0444	1.1557	OLFM4
205040_at	0.000409	1.15407	ORM1
209370_s_at	5.61e-19	1.15379	SH3BP2
215125_s_at	0.00549	1.15328	UGT1A3///UGT1A1///UGT1A4///UGT1A9///UGT1A5///UGT1A6///UGT1A7///UGT1A8///UGT1A10
209703_x_at	2.15e-09	1.15283	METTL7A
213900_at	2.08e-08	1.14967	FAM189A2
200890_s_at	7.63e-07	1.14954	SSR1
204633_s_at	1.4e-08	1.14897	RPS6KA5
210641_at	0.00142	1.14871	CAPN9
219799_s_at	0.000101	1.14844	DHRS9
211548_s_at	0.00962	1.14658	HPGD
214750_at	1.3e-13	1.14463	PLAC4
210594_x_at	1.06e-11	1.14461	MPZL1
201556_s_at	2.37e-19	1.14249	VAMP2
215100_at	4.3e-06	1.1384	ADTRP
220445_s_at	0.00251	1.13765	CSAG2///CSAG3
219564_at	0.00048	1.1373	KCNJ16
204199_at	1.44e-08	1.13729	RALGPS1
214823_at	4.51e-13	1.13552	ZNF204P
213792_s_at	8.57e-08	1.13546	INSR
209728_at	0.0274	1.13531	HLA-DRB4
205831_at	6.07e-06	1.1352	CD2
205660_at	0.000351	1.13503	OASL
213717_at	6.9e-14	1.13409	LDB3
202708_s_at	2.24e-06	1.13397	HIST2H2BE
204669_s_at	8.01e-08	1.13165	RNF24
211653_x_at	0.000214	1.13163	LOC101930400///AKR1C2
209480_at	0.00998	1.13078	HLA-DQB1
221132_at	0.0142	1.13029	CLDN18
212450_at	2.64e-08	1.13002	SECISBP2L
205517_at	0.000164	1.1299	GATA4
204777_s_at	3.62e-06	1.12943	MAL
215754_at	2.5e-16	1.12698	SCARB2
217162_at	2.78e-14	1.12445	TSPY1
207651_at	1.24e-09	1.12392	GPR171
216351_x_at	0.0161	1.12226	DAZ4///DAZ2///DAZ3///DAZ1
216418_at	3.08e-14	1.12198
205922_at	1.18e-06	1.12033	VNN2
217236_x_at	9.93e-12	1.11966	IGHV4-31///IGHM///IGHG4///IGHG3///IGHG1///IGHD///IGHA2///IGHA1///IGH
212091_s_at	1.95e-07	1.11932	COL6A1
206094_x_at	0.00122	1.11752	UGT1A3///UGT1A1///UGT1A4///UGT1A9///UGT1A5///UGT1A6///UGT1A7///UGT1A8///UGT1A10
204959_at	0.000624	1.11683	MNDA
221750_at	1.56e-07	1.11623	HMGCS1
208596_s_at	0.00222	1.11511	UGT1A3///UGT1A1///UGT1A4///UGT1A9///UGT1A5///UGT1A6///UGT1A7///UGT1A8///UGT1A10
213298_at	9.29e-13	1.11495	NFIC
219400_at	2.89e-15	1.11334	CNTNAP1
211689_s_at	2.12e-05	1.11283	TMPRSS2
219509_at	6.03e-16	1.1127	MYOZ1
210143_at	0.0159	1.11198	ANXA10
207023_x_at	2.66e-09	1.11134	KRT10
201801_s_at	1.5e-07	1.11056	SLC29A1
211637_x_at	0.000181	1.11033	IGHV3-23///IGHV4-31///IGHM///IGHG4///IGHG3///IGHG1///IGHD///IGHA2///IGHA1///IGH
204237_at	0.000337	1.11023	GULP1
206025_s_at	0.002	1.11004	TNFAIP6
205717_x_at	4.56e-12	1.10834	PCDHGA1///PCDHGA2///PCDHGA3///PCDHGA4///PCDHGA5///PCDHGA6///PCDHGA7///PCDHGA9///PCDHGA10///PCDHGA11///PCDHGB1///PCDHGB2///PCDHGB3///PCDHGB5///PCDHGB6///PCDHGB7///PCDHGC4///PCDHGC5///PCDHGA12///PCDHGA8///PCDHGB4///PCDHGC3
219956_at	0.000221	1.10756	GALNT6
215068_s_at	5.31e-12	1.10684	FBXL18
202017_at	3.99e-07	1.1066	EPHX1
213637_at	5.51e-09	1.10659	DDX52
221045_s_at	7.03e-07	1.10618	PER3
210056_at	1.53e-09	1.10593	RND1
220748_s_at	1.29e-11	1.10564	ZNF580
211793_s_at	2.58e-12	1.10519	ABI2
203555_at	3.46e-10	1.1045	PTPN18
202917_s_at	0.00808	1.10417	S100A8
215471_s_at	1.03e-11	1.10326	MAP7
220177_s_at	0.000162	1.10313	TMPRSS3
221095_s_at	0.000356	1.10213	KCNE2
215247_at	2.17e-16	1.10188	LOC100288570
213986_s_at	1.19e-10	1.10164	TMEM259
204908_s_at	4.9e-10	1.10116	MIR8085///BCL3
220371_s_at	2.1e-13	1.10059	SLC12A9
203224_at	2.82e-09	1.09976	RFK
217506_at	2.51e-06	1.09931
218880_at	1.51e-08	1.09831	FOSL2
205166_at	7.57e-08	1.09732	CAPN5
204477_at	8.14e-23	1.09674	RABIF
221577_x_at	0.00146	1.09603	GDF15
221856_s_at	2.91e-14	1.09561	FAM63A
203343_at	6.12e-06	1.09557	UGDH
220017_x_at	0.000286	1.09529	CYP2C9
211098_x_at	4e-12	1.09419	TMCO1
216560_x_at	0.00234	1.09386	IGLC1
206263_at	1.59e-12	1.09312	FMO4
201118_at	2.49e-08	1.09266	PGD
1405_i_at	6.98e-05	1.09262	CCL5
220097_s_at	2.47e-16	1.09197	TMEM104
211241_at	1.06e-18	1.09183	ANXA2P3
204563_at	0.000191	1.0915	SELL
219014_at	0.00738	1.09118	PLAC8
203925_at	7.48e-08	1.09029	GCLM
204038_s_at	1.1e-16	1.09018	LPAR1
205992_s_at	8.31e-06	1.0895	IL15
203908_at	0.00374	1.08729	SLC4A4
205289_at	9.09e-06	1.08675	BMP2
209189_at	0.000113	1.08615	FOS
203936_s_at	9.9e-05	1.08599	MMP9
211959_at	0.000313	1.08561	IGFBP5
207847_s_at	0.000313	1.08552	MUC1
212594_at	4.73e-07	1.0853	MIR4680///PDCD4
204341_at	7.44e-07	1.08509	TRIM16
214526_x_at	4.45e-12	1.08491	PMS2P1
214726_x_at	1.13e-14	1.08398	ADD1
203657_s_at	1.45e-13	1.08248	CTSF
220352_x_at	4.37e-13	1.08213	FLJ42627
36564_at	1.69e-06	1.0817	RNF19B
205041_s_at	0.0156	1.08119	ORM2///ORM1
208473_s_at	0.00147	1.08068	GP2
212927_at	1.94e-08	1.0804	SMC5
217179_x_at	0.000813	1.07903	BMS1P20
216243_s_at	2.74e-05	1.07878	IL1RN
214370_at	2.08e-07	1.07865	S100A8
206337_at	5.57e-08	1.07829	CCR7
208024_s_at	6.52e-09	1.07749	DGCR6L///DGCR6
209367_at	2.16e-09	1.07547	STXBP2
209309_at	0.00429	1.07532	AZGP1
205959_at	5.03e-06	1.07491	MMP13
205869_at	0.000904	1.07469	PRSS2///PRSS1
205168_at	1.47e-07	1.07421	DDR2
207469_s_at	1.77e-05	1.07409	PIR
217617_at	1.91e-06	1.07371
213716_s_at	1.33e-07	1.07282	SECTM1
202731_at	4.94e-05	1.07281	MIR4680///PDCD4
217542_at	2.7e-16	1.07278	MDM2
221345_at	1.12e-06	1.07271	FFAR2
202509_s_at	1.01e-09	1.07191	TNFAIP2
211470_s_at	0.0146	1.07188	SULT1C2
205758_at	7.64e-07	1.07188	CD8A
205051_s_at	3.4e-05	1.07182	KIT
219077_s_at	1.41e-07	1.07182	WWOX
218352_at	7.6e-06	1.07175	RCBTB1
212735_at	1.25e-17	1.07125	RUBCN
214264_s_at	3.16e-09	1.07046	EFCAB11
203002_at	1.86e-06	1.0699	AMOTL2
204151_x_at	0.000613	1.06947	AKR1C1
205617_at	1.84e-15	1.06906	PRRG2
203298_s_at	3.74e-09	1.06834	JARID2
219891_at	7.54e-12	1.06825	PGPEP1
204532_x_at	0.00195	1.06823	UGT1A1///UGT1A4///UGT1A9///UGT1A6///UGT1A8///UGT1A10
204988_at	0.000582	1.06763	FGB
203218_at	1.11e-08	1.06757	MAPK9
203892_at	0.000749	1.06729	WFDC2
213038_at	2.09e-07	1.06664	RNF19B
209221_s_at	3.68e-13	1.06657	OSBPL2
213036_x_at	1.43e-05	1.06624	ATP2A3
219704_at	4.77e-10	1.06599	YBX2
210873_x_at	1.61e-05	1.06586	APOBEC3A_B///APOBEC3A
222372_at	6.19e-06	1.0655	MAGI1
204267_x_at	1.69e-14	1.06527	PKMYT1
211737_x_at	0.000297	1.0651	PTN
37462_i_at	2.43e-09	1.06463	SF3A2
204655_at	2.98e-05	1.06381	CCL5
214718_at	8.92e-07	1.06378	GATAD1
214315_x_at	1.5e-06	1.06315	CALR
212823_s_at	2.51e-12	1.06283	PLEKHG3
210184_at	7.99e-09	1.06238	ITGAX
200731_s_at	1.87e-09	1.0614	PTP4A1
209301_at	0.0102	1.05954	CA2
205927_s_at	0.00556	1.05876	CTSE
209500_x_at	6.07e-07	1.05871	TNFSF12-TNFSF13///TNFSF13
211654_x_at	0.00129	1.05864	HLA-DQB1
205463_s_at	7.91e-07	1.05823	PDGFA
219125_s_at	1.51e-12	1.05803	SLC50A1
214755_at	7.18e-09	1.05762	UAP1L1
203914_x_at	0.011	1.05734	HPGD
203984_s_at	4.78e-13	1.05646	CASP9
209916_at	3.02e-09	1.05583	DHTKD1
205653_at	3.71e-15	1.0558	CTSG
215568_x_at	2.02e-15	1.05566	LYPLA2
216025_x_at	0.000299	1.05564	CYP2C9
206558_at	2.77e-08	1.05557	SIM2
214241_at	5.46e-10	1.05474	NDUFB8
220641_at	1.24e-11	1.05398	NOX5
214835_s_at	5.86e-06	1.05369	SUCLG2
203503_s_at	2.37e-14	1.05367	PEX14
211563_s_at	0.000381	1.05183	URI1
202929_s_at	1.76e-10	1.05102	DDTL///DDT
219727_at	0.0143	1.05082	DUOX2
206011_at	1.39e-05	1.05026	CASP1
220338_at	7.95e-08	1.05006	RALGPS2
216500_at	2.3e-15	1.05005
206641_at	0.00378	1.0498	TNFRSF17
215071_s_at	9.44e-06	1.0495	HIST1H2AC
219195_at	5.98e-10	1.0488	PPARGC1A
209879_at	1.61e-09	1.04844	SELPLG
207717_s_at	0.000617	1.04839	PKP2
206631_at	9.74e-09	1.04818	PTGER2
218085_at	1.14e-06	1.04776	CHMP5
202387_at	1.48e-11	1.04728	BAG1
211598_x_at	2.26e-24	1.04701	VIPR2
216510_x_at	0.00071	1.04684	IGHV3-23///IGHV4-31///IGHM///IGHG1///IGHA1
219946_x_at	1.22e-07	1.04586	MYH14
209772_s_at	5.84e-05	1.04583	CD24
218137_s_at	2.06e-10	1.04542	SMAP1
208715_at	4.01e-11	1.04486	TMCO1
209378_s_at	7.91e-11	1.04445	CCSER2
211495_x_at	2.38e-08	1.04417	TNFSF12-TNFSF13///TNFSF13
215867_x_at	0.000129	1.04378	CA12
201849_at	0.00163	1.04374	BNIP3
211506_s_at	0.0325	1.04347	CXCL8
207325_x_at	0.000292	1.04308	MAGEA1
206539_s_at	1.73e-06	1.04302	CYP4F12
213839_at	8.5e-07	1.04243	CLMN
221866_at	5.9e-13	1.04235	TFEB
204419_x_at	6.08e-05	1.04229	HBG2///HBG1
211071_s_at	0.0015	1.04216	MLLT11
208184_s_at	1.5e-17	1.04214	LOC102724200///TRAPPC10
217485_x_at	2.31e-15	1.04153	PMS2P1
208650_s_at	0.000257	1.04139	CD24
218999_at	1.35e-07	1.0394	TMEM140
202768_at	1.42e-10	1.03909	FOSB
218812_s_at	5.62e-17	1.03907	ORAI2
212223_at	1.17e-08	1.03884	IDS
221133_s_at	0.0336	1.0385	CLDN18
218420_s_at	9.24e-10	1.03842	PROSER1
210606_x_at	4.06e-11	1.03766	KLRD1
212216_at	5.78e-07	1.03763	PREPL
204037_at	1.73e-10	1.03763	LPAR1
221497_x_at	1.51e-09	1.0374	EGLN1
214433_s_at	0.000105	1.03727	SELENBP1
205049_s_at	9.13e-06	1.03714	CD79A
214131_at	0.000256	1.03703	TXLNGY
204457_s_at	0.00184	1.03685	GAS1
209522_s_at	7.46e-09	1.03553	CRAT
203453_at	0.00132	1.03549	SCNN1A
202497_x_at	0.000967	1.03477	SLC2A3
220987_s_at	8e-07	1.03472	NUAK2///AKIP1
210582_s_at	6.17e-15	1.03448	LIMK2
211766_s_at	3.76e-05	1.03448	PNLIPRP2
205632_s_at	0.000151	1.03406	PIP5K1B
206082_at	1.5e-05	1.03398	HCP5
213836_s_at	8.56e-09	1.03378	WIPI1
209795_at	3.78e-06	1.03377	CD69
218245_at	4.06e-13	1.03362	TSKU
205102_at	2.05e-11	1.03309	TMPRSS2
211624_s_at	4.85e-19	1.03275	DRD2
205456_at	1.13e-10	1.03265	CD3E
204181_s_at	1.32e-10	1.03228	ZBTB43
210253_at	2.71e-11	1.03208	HTATIP2
204951_at	2.31e-06	1.03197	RHOH
206522_at	9.61e-05	1.03165	MGAM
213110_s_at	0.000408	1.03103	COL4A5
208915_s_at	1.6e-18	1.03087	GGA2
210469_at	2.29e-14	1.03085	DLG5
204448_s_at	7.11e-16	1.03079	PDCL
203116_s_at	5.98e-11	1.03017	FECH
202053_s_at	1.39e-08	1.02984	ALDH3A2
205502_at	2.05e-07	1.0297	CYP17A1
203456_at	9.64e-10	1.02906	PRAF2
204508_s_at	8.65e-06	1.02894	CA12
50221_at	4.68e-10	1.02888	TFEB
214173_x_at	0.00016	1.02886	URI1
214088_s_at	5.34e-05	1.02883	FUT3
203277_at	7.68e-09	1.02746	DFFA
209699_x_at	0.00308	1.02688	LOC101930400///AKR1C2
220528_at	1.99e-08	1.02642	VNN3
220373_at	1.67e-17	1.02614	DCHS2
219236_at	2.52e-14	1.02449	PAQR6
215949_x_at	6.83e-07	1.0242	IGHM
219028_at	2.98e-08	1.02406	HIPK2
213066_at	5.16e-15	1.02306	RUSC2
216843_x_at	1.37e-12	1.02267	PMS2P1
220421_at	0.00147	1.02205	BTNL8
211650_x_at	0.000102	1.02163	IGHV3-23///IGHV4-31///IGHM///IGHG3///IGHG1///IGHD///IGHA1///IGH
208300_at	8.02e-05	1.02126	PTPRH
208268_at	0.0036	1.021	ADAM28
214303_x_at	0.0292	1.02086	MUC5AC
213336_at	3.31e-13	1.02045	BAZ1B
213878_at	1.93e-06	1.0203	PYROXD1
211881_x_at	0.000255	1.02014	IGLJ3
202500_at	2.03e-12	1.02012	DNAJB2
203834_s_at	4.38e-12	1.01986	TGOLN2
215913_s_at	6.82e-06	1.01983	GULP1
219802_at	0.000207	1.01978	PYROXD1
212923_s_at	3.84e-09	1.019	PXDC1
214637_at	1.05e-09	1.01898	OSM
210539_at	1.06e-18	1.01898	TTLL5
215491_at	1.03e-18	1.01885	MYCL
207907_at	7.29e-08	1.01837	TNFSF14
208488_s_at	1.75e-22	1.01825	CR1
217219_at	5.69e-17	1.0178	DKFZP434A062
202054_s_at	1.92e-07	1.01762	ALDH3A2
220354_at	5.81e-11	1.01755	MCF2L-AS1
211798_x_at	0.000721	1.0173	IGLJ3
222167_at	1.7e-08	1.01693
214121_x_at	1.51e-13	1.01686	PDLIM7
209354_at	7.89e-10	1.01621	TNFRSF14
209364_at	1.29e-10	1.01588	BAD
203167_at	1.79e-06	1.01459	TIMP2
211458_s_at	2.94e-06	1.01455	GABARAPL3///GABARAPL1
212683_at	5.36e-14	1.01409	SLC25A44
214964_at	6.91e-09	1.01404
203591_s_at	3.83e-05	1.01347	CSF3R
209515_s_at	3.75e-05	1.01332	RAB27A
219371_s_at	1.75e-05	1.0127	KLF2
221125_s_at	1.57e-13	1.01267	KCNMB3
212616_at	3.79e-07	1.01222	CHD9
211499_s_at	1.52e-15	1.01178	MAPK11
203708_at	0.000281	1.01167	PDE4B
206211_at	0.00197	1.01161	SELE
221217_s_at	1.08e-14	1.01111	RBFOX1
211635_x_at	2.81e-05	1.01104	IGHV4-31///IGHM///IGHG4///IGHG3///IGHG1///IGHD///IGHA2///IGHA1
AFFX-HUMISGF3A/M97935_MB_at	4.2e-05	1.01045	STAT1
202391_at	0.000369	1.01029	BASP1
209170_s_at	2.71e-05	1.01023	GPM6B
201535_at	2.61e-06	1.01003	UBL3
209121_x_at	3.32e-08	1.00992	NR2F2
215006_at	5.51e-08	1.00991
215888_at	2.08e-06	1.00947	PDS5B
219298_at	9.01e-05	1.00875	ECHDC3
216995_x_at	1.17e-21	1.00809	MKRN2
209878_s_at	2.74e-14	1.00781	RELA
204158_s_at	1.35e-07	1.00765	TCIRG1
222234_s_at	2.24e-15	1.00759	DBNDD1
209499_x_at	4.08e-06	1.00753	TNFSF12-TNFSF13///TNFSF13
207938_at	1.42e-16	1.00624	PI15
213584_s_at	1.07e-12	1.00566	CREBZF
216138_at	2.39e-12	1.00565
209912_s_at	2.54e-10	1.00543	MIR4656///AP5Z1
206271_at	0.000115	1.00542	TLR3
221880_s_at	3.44e-10	1.00485	FAM174B
211026_s_at	0.000147	1.00462	MGLL
201794_s_at	1.43e-09	1.00394	SMG7
206262_at	0.0316	1.00343	ADH1C
203474_at	0.000198	1.0031	IQGAP2
206687_s_at	4.47e-12	1.00257	PTPN6
207356_at	0.00347	1.00233	DEFB4B///DEFB4A
203896_s_at	0.000346	1.00196	PLCB4
204007_at	0.000782	1.00173	FCGR3B
200856_x_at	7.32e-09	1.00163	NCOR1
204425_at	7.54e-12	1.00149	ARHGAP4
206618_at	5.33e-09	1.00148	IL18R1
218411_s_at	5.21e-08	1.00148	MBIP
214767_s_at	3.01e-10	1.00064	HSPB6
208092_s_at	4.28e-07	1.0006	FAM49A
212599_at	3.63e-05	1.00054	AUTS2
202513_s_at	3.66e-15	1.0005	PPP2R5D
201044_x_at	1.91e-10	1.00017	DUSP1
210845_s_at	1.65e-05	1.00004	PLAUR
